# Supplementary material for: Nacre morphology and chemical composition in Atlantic winged oyster Pteria colymbus (Röding, 1798)
Source: PeerJ. 2021 Jul 15;9:e11527. doi: 10.7717/peerj.11527 (PMC8286703; doi:10.7717/peerj.11527)
Supplement: Supplemental Information 1 [file peerj-09-11527-s001.xlsx]

## Sheet: XRD PC
2theta	Column 1
10	13.9694
10.0204439144582	13.8413
10.0408878289163	13.9012
10.0613317433745	13.9848
10.0817756578326	13.9559
10.1022195722908	13.7917
10.1226634867489	13.8621
10.1431074012071	13.5952
10.1635513156652	13.4529
10.1839952301234	13.4692
10.2044391445816	13.3571
10.2248830590397	13.3209
10.2453269734979	13.4226
10.265770887956	13.2579
10.2862148024142	13.2723
10.3066587168723	13.6032
10.3271026313305	13.6959
10.3475465457886	13.504
10.3679904602468	13.4737
10.388434374705	13.2297
10.4088782891631	13.1443
10.4293222036213	13.1969
10.4497661180794	13.3383
10.4702100325376	13.5109
10.4906539469957	13.5045
10.5110978614539	13.1895
10.531541775912	12.9102
10.5519856903702	12.6845
10.5724296048284	12.7287
10.5928735192865	12.9603
10.6133174337447	12.8899
10.6337613482028	12.6111
10.654205262661	12.4802
10.6746491771191	12.3686
10.6950930915773	12.4717
10.7155370060354	12.6195
10.7359809204936	12.881
10.7564248349518	12.8214
10.7768687494099	12.8145
10.7973126638681	12.8656
10.8177565783262	12.9191
10.8382004927844	12.7932
10.8586444072425	12.7991
10.8790883217007	12.6305
10.8995322361588	12.5422
10.919976150617	12.7232
10.9404200650752	12.6994
10.9608639795333	12.4325
10.9813078939915	12.3581
11.0017518084496	12.3651
11.0221957229078	12.1979
11.0426396373659	12.247
11.0630835518241	12.2867
11.0835274662822	12.2232
11.1039713807404	12.3224
11.1244152951986	12.6766
11.1448592096567	12.5858
11.1653031241149	12.3095
11.185747038573	12.1637
11.2061909530312	12.1186
11.2266348674893	11.9911
11.2470787819475	12.2827
11.2675226964056	12.2912
11.2879666108638	12.1513
11.308410525322	12.2639
11.3288544397801	12.124
11.3492983542383	11.9162
11.3697422686964	12.005
11.3901861831546	12.1448
11.4106300976127	12.187
11.4310740120709	12.3194
11.451517926529	12.1483
11.4719618409872	12.004
11.4924057554454	11.9087
11.5128496699035	11.8502
11.5332935843617	11.7966
11.5537374988198	11.7113
11.574181413278	11.6275
11.5946253277361	11.7307
11.6150692421943	11.6488
11.6355131566525	11.6811
11.6559570711106	11.7723
11.6764009855688	11.6647
11.6968449000269	11.6319
11.7172888144851	11.6205
11.7377327289432	11.4851
11.7581766434014	11.6612
11.7786205578595	11.8358
11.7990644723177	11.9132
11.8195083867759	12.0704
11.839952301234	11.8442
11.8603962156922	11.7381
11.8808401301503	11.8155
11.9012840446085	11.9608
11.9217279590666	12.062
11.9421718735248	12.0437
11.9626157879829	11.8398
11.9830597024411	11.8328
12.0035036168993	11.7812
12.0239475313574	11.7302
12.0443914458156	11.5461
12.0648353602737	11.6607
12.0852792747319	11.7014
12.10572318919	11.8606
12.1261671036482	11.7039
12.1466110181063	11.4821
12.1670549325645	11.2331
12.1874988470227	11.2812
12.2079427614808	11.3859
12.228386675939	11.6404
12.2488305903971	11.7049
12.2692745048553	11.8641
12.2897184193134	11.8606
12.3101623337716	11.8125
12.3306062482297	11.8507
12.3510501626879	11.8844
12.3714940771461	11.8725
12.3919379916042	11.7525
12.4123819060624	11.6369
12.4328258205205	11.5769
12.4532697349787	11.4673
12.4737136494368	11.3814
12.494157563895	11.4931
12.5146014783531	11.4023
12.5350453928113	11.3576
12.5554893072695	11.3229
12.5759332217276	11.3204
12.5963771361858	11.2421
12.6168210506439	11.3165
12.6372649651021	11.2937
12.6577088795602	11.1339
12.6781527940184	10.9886
12.6985967084765	10.7951
12.7190406229347	10.7059
12.7394845373929	10.7698
12.759928451851	10.9127
12.7803723663092	11.2004
12.8008162807673	11.2416
12.8212601952255	11.0794
12.8417041096836	11.0689
12.8621480241418	11.1037
12.8825919385999	10.9072
12.9030358530581	11.0402
12.9234797675163	10.9484
12.9439236819744	10.8547
12.9643675964326	10.9529
12.9848115108907	10.8765
13.0052554253489	10.7475
13.025699339807	10.7138
13.0461432542652	10.8185
13.0665871687233	10.7535
13.0870310831815	10.7778
13.1074749976397	10.4211
13.1279189120978	10.3031
13.148362826556	10.2401
13.1688067410141	10.3383
13.1892506554723	10.3061
13.2096945699304	10.5372
13.2301384843886	10.5938
13.2505823988467	10.7009
13.2710263133049	10.7108
13.2914702277631	10.5159
13.3119141422212	10.2887
13.3323580566794	10.2455
13.3528019711375	10.4524
13.3732458855957	10.7153
13.3936898000538	10.9291
13.414133714512	10.8651
13.4345776289701	10.5709
13.4550215434283	10.1597
13.4754654578865	10.0764
13.4959093723446	10.2892
13.5163532868028	10.4821
13.5367972012609	10.3358
13.5572411157191	10.3651
13.5776850301772	10.2148
13.5981289446354	10.1751
13.6185728590935	10.1999
13.6390167735517	10.1429
13.6594606880099	9.78274
13.679904602468	10.0551
13.7003485169262	10.2416
13.7207924313843	10.317
13.7412363458425	10.0397
13.7616802603006	9.75
13.7821241747588	9.68403
13.8025680892169	9.85764
13.8230120036751	9.93353
13.8434559181333	10.0635
13.8638998325914	9.92014
13.8843437470496	9.66121
13.9047876615077	9.7128
13.9252315759659	9.80704
13.945675490424	9.92956
13.9661194048822	10.186
13.9865633193403	10.2346
14.0070072337985	9.92956
14.0274511482567	9.48562
14.0478950627148	9.37054
14.068338977173	9.49851
14.0887828916311	9.65327
14.1092268060893	9.70536
14.1296707205474	9.67708
14.1501146350056	9.41815
14.1705585494637	9.29018
14.1910024639219	9.49653
14.2114463783801	9.57143
14.2318902928382	9.66319
14.2523342072964	9.75099
14.2727781217545	9.64087
14.2932220362127	9.50397
14.3136659506708	9.47321
14.334109865129	9.35367
14.3545537795871	9.312
14.3749976940453	9.25595
14.3954416085035	9.26389
14.4158855229616	9.35417
14.4363294374198	9.43105
14.4567733518779	9.5744
14.4772172663361	9.45089
14.4976611807942	9.40675
14.5181050952524	9.25645
14.5385490097106	9.03869
14.5589929241687	8.95734
14.5794368386269	9.04365
14.599880753085	8.83631
14.6203246675432	8.91815
14.6407685820013	9.06399
14.6612124964595	9.03522
14.6816564109176	9.12103
14.7021003253758	9.10317
14.722544239834	8.88046
14.7429881542921	8.89236
14.7634320687503	9.05556
14.7838759832084	8.96429
14.8043198976666	8.77877
14.8247638121247	8.46379
14.8452077265829	8.3244
14.865651641041	8.44692
14.8860955554992	8.69097
14.9065394699574	8.6999
14.9269833844155	8.57391
14.9474272988737	8.37996
14.9678712133318	8.38442
14.98831512779	8.49802
15.0087590422481	8.66319
15.0292029567063	8.67857
15.0496468711644	8.53175
15.0700907856226	8.33581
15.0905347000808	8.14831
15.1109786145389	8.02778
15.1314225289971	7.9251
15.1518664434552	8.13294
15.1723103579134	8.33284
15.1927542723715	8.47569
15.2131981868297	8.50843
15.2336421012878	8.28175
15.254086015746	8.1374
15.2745299302042	7.97867
15.2949738446623	8.09573
15.3154177591205	8.14087
15.3358616735786	8.2872
15.3563055880368	8.25298
15.3767495024949	8.29812
15.3971934169531	7.94147
15.4176373314112	8.12103
15.4380812458694	8.13046
15.4585251603276	8.15427
15.4789690747857	8.20387
15.4994129892439	8.09127
15.519856903702	7.9628
15.5403008181602	8.24157
15.5607447326183	8.10863
15.5811886470765	8.02827
15.6016325615346	7.86111
15.6220764759928	7.59177
15.642520390451	7.66468
15.6629643049091	7.82639
15.6834082193673	7.7753
15.7038521338254	7.86806
15.7242960482836	7.81151
15.7447399627417	7.78175
15.7651838771999	8.01835
15.785627791658	8.12798
15.8060717061162	8.00099
15.8265156205744	7.76141
15.8469595350325	7.53472
15.8674034494907	7.3879
15.8878473639488	7.46974
15.908291278407	7.6121
15.9287351928651	7.65972
15.9491791073233	7.61359
15.9696230217814	7.64236
15.9900669362396	7.39583
16.0105108506978	7.31944
16.0309547651559	7.39435
16.0513986796141	7.55704
16.0718425940722	7.66815
16.0922865085304	7.75248
16.1127304229885	7.45883
16.1331743374467	7.43304
16.1536182519048	7.49157
16.174062166363	7.42312
16.1945060808212	7.3373
16.2149499952793	7.29563
16.2353939097375	7.0377
16.2558378241956	7.10367
16.2762817386538	7.05208
16.2967256531119	7.08929
16.3171695675701	7.34524
16.3376134820282	7.65823
16.3580573964864	7.65427
16.3785013109446	7.62847
16.3989452254027	7.31101
16.4193891398609	7.15228
16.439833054319	7.14385
16.4602769687772	7.14335
16.4807208832353	7.04216
16.5011647976935	6.98264
16.5216087121516	6.90526
16.5420526266098	7.00794
16.562496541068	7.14038
16.5829404555261	7.10417
16.6033843699843	7.02431
16.6238282844424	7.05258
16.6442721989006	6.91121
16.6647161133587	7.02629
16.6851600278169	6.93601
16.705603942275	6.9122
16.7260478567332	6.95883
16.7464917711914	7.02728
16.7669356856495	6.99107
16.7873796001077	7.07986
16.8078235145658	7.062
16.828267429024	7.10317
16.8487113434821	6.9876
16.8691552579403	6.77431
16.8895991723984	6.65823
16.9100430868566	6.53522
16.9304870013148	6.67659
16.9509309157729	6.72569
16.9713748302311	6.75942
16.9918187446892	6.76736
17.0122626591474	6.85863
17.0327065736055	6.75595
17.0531504880637	6.76885
17.0735944025218	6.89087
17.09403831698	6.85367
17.1144822314382	6.87351
17.1349261458963	6.86359
17.1553700603545	6.57986
17.1758139748126	6.4003
17.1962578892708	6.41022
17.2167018037289	6.36359
17.2371457181871	6.53026
17.2575896326452	6.6245
17.2780335471034	6.55159
17.2984774615616	6.65774
17.3189213760197	6.65873
17.3393652904779	6.70784
17.359809204936	6.70982
17.3802531193942	6.65625
17.4006970338523	6.43998
17.4211409483105	6.43155
17.4415848627687	6.37103
17.4620287772268	6.35367
17.482472691685	6.33532
17.5029166061431	6.29762
17.5233605206013	6.27431
17.5438044350594	6.2371
17.5642483495176	6.20933
17.5846922639757	6.14236
17.6051361784339	6.20734
17.6255800928921	6.2629
17.6460240073502	6.54067
17.6664679218084	6.49107
17.6869118362665	6.38145
17.7073557507247	6.14732
17.7277996651828	6.0253
17.748243579641	6.15526
17.7686874940991	6.28671
17.7891314085573	6.32093
17.8095753230155	6.39484
17.8300192374736	6.12103
17.8504631519318	5.83284
17.8709070663899	5.88492
17.8913509808481	5.88194
17.9117948953062	5.94444
17.9322388097644	6.08433
17.9526827242225	6.02232
17.9731266386807	5.99355
17.9935705531389	6.09325
18.014014467597	6.08879
18.0344583820552	5.95188
18.0549022965133	5.81597
18.0753462109715	5.71925
18.0957901254296	5.67262
18.1162340398878	5.68651
18.1366779543459	5.78671
18.1571218688041	5.89286
18.1775657832623	5.9881
18.1980096977204	5.88938
18.2184536121786	5.7748
18.2388975266367	5.58532
18.2593414410949	5.70585
18.279785355553	5.69544
18.3002292700112	5.69296
18.3206731844693	5.63046
18.3411170989275	5.61458
18.3615610133857	5.48859
18.3820049278438	5.59722
18.402448842302	5.65972
18.4228927567601	5.82738
18.4433366712183	6.02778
18.4637805856764	5.87698
18.4842245001346	5.59375
18.5046684145927	5.32937
18.5251123290509	5.20238
18.5455562435091	5.27282
18.5660001579672	5.41319
18.5864440724254	5.43552
18.6068879868835	5.53224
18.6273319013417	5.66319
18.6477758157998	5.60466
18.668219730258	5.43849
18.6886636447161	5.31647
18.7091075591743	5.28224
18.7295514736325	5.2629
18.7499953880906	5.52133
18.7704393025488	5.50893
18.7908832170069	5.43502
18.8113271314651	5.49554
18.8317710459232	5.51835
18.8522149603814	5.47272
18.8726588748395	5.58581
18.8931027892977	5.54712
18.9135467037559	5.53522
18.933990618214	5.55357
18.9544345326722	5.42262
18.9748784471303	5.313
18.9953223615885	5.21478
19.0157662760466	5.26141
19.0362101905048	5.23165
19.0566541049629	5.29117
19.0770980194211	5.13988
19.0975419338793	5.03571
19.1179858483374	5.01637
19.1384297627956	4.99454
19.1588736772537	5.04911
19.1793175917119	5.0749
19.19976150617	5.03968
19.2202054206282	5.02877
19.2406493350863	5.063
19.2610932495445	5.06845
19.2815371640027	5.21925
19.3019810784608	5.21429
19.322424992919	5.12202
19.3428689073771	5.1002
19.3633128218353	4.9752
19.3837567362934	5.01736
19.4042006507516	5.10764
19.4246445652097	5.17857
19.4450884796679	5.05952
19.4655323941261	5.07391
19.4859763085842	4.94792
19.5064202230424	5.00496
19.5268641375005	5.08581
19.5473080519587	5.06944
19.5677519664168	5.05456
19.588195880875	4.97867
19.6086397953331	4.94296
19.6290837097913	5.03819
19.6495276242495	5.13988
19.6699715387076	5.14732
19.6904154531658	5.06498
19.7108593676239	4.88839
19.7313032820821	4.72371
19.7517471965402	4.71429
19.7721911109984	4.71181
19.7926350254565	4.85565
19.8130789399147	4.80407
19.8335228543729	4.94296
19.853966768831	4.85218
19.8744106832892	4.81002
19.8948545977473	4.71032
19.9152985122055	4.72817
19.9357424266636	4.60565
19.9561863411218	4.71181
19.9766302555799	4.6994
19.9970741700381	4.62401
20.0175180844963	4.6627
20.0379619989544	4.61161
20.0584059134126	4.52331
20.0788498278707	4.50942
20.0992937423289	4.47966
20.119737656787	4.36855
20.1401815712452	4.34325
20.1606254857033	4.30506
20.1810694001615	4.50347
20.2015133146197	4.64534
20.2219572290778	4.87103
20.242401143536	4.85913
20.2628450579941	4.69048
20.2832889724523	4.51984
20.3037328869104	4.48214
20.3241768013686	4.38641
20.3446207158268	4.43056
20.3650646302849	4.32837
20.3855085447431	4.30556
20.4059524592012	4.36607
20.4263963736594	4.47917
20.4468402881175	4.61409
20.4672842025757	4.57242
20.4877281170338	4.56548
20.508172031492	4.54415
20.5286159459502	4.55109
20.5490598604083	4.59425
20.5695037748665	4.54812
20.5899476893246	4.38839
20.6103916037828	4.33879
20.6308355182409	4.27381
20.6512794326991	4.2996
20.6717233471572	4.31845
20.6921672616154	4.42411
20.7126111760736	4.50942
20.7330550905317	4.54861
20.7534990049899	4.53373
20.773942919448	4.51687
20.7943868339062	4.44444
20.8148307483643	4.57292
20.8352746628225	4.52877
20.8557185772806	4.41518
20.8761624917388	4.22669
20.896606406197	4.21081
20.9170503206551	4.12798
20.9374942351133	4.1999
20.9579381495714	4.13145
20.9783820640296	4.21329
20.9988259784877	4.16419
21.0192698929459	4.27083
21.039713807404	4.2877
21.0601577218622	4.19395
21.0806016363204	4.14435
21.1010455507785	4.24107
21.1214894652367	4.2505
21.1419333796948	4.22569
21.162377294153	4.33383
21.1828212086111	4.27629
21.2032651230693	4.28026
21.2237090375274	4.26091
21.2441529519856	4.09177
21.2645968664438	4.06746
21.2850407809019	4.36806
21.3054846953601	4.50595
21.3259286098182	4.47718
21.3463725242764	4.37004
21.3668164387345	4.04067
21.3872603531927	4.01984
21.4077042676508	4.20536
21.428148182109	4.33978
21.4485920965672	4.37004
21.4690360110253	4.43254
21.4894799254835	4.4375
21.5099238399416	4.38591
21.5303677543998	4.36806
21.5508116688579	4.25198
21.5712555833161	4.10268
21.5916994977742	4.03026
21.6121434122324	4.03224
21.6325873266906	4.13343
21.6530312411487	4.23661
21.6734751556069	4.22073
21.693919070065	4.26587
21.7143629845232	4.3249
21.7348068989813	4.29762
21.7552508134395	4.24653
21.7756947278976	4.07093
21.7961386423558	3.95536
21.816582556814	3.96429
21.8370264712721	4.07688
21.8574703857303	4.17113
21.8779143001884	4.11062
21.8983582146466	4.15575
21.9188021291047	4.10268
21.9392460435629	4.02629
21.959689958021	3.96032
21.9801338724792	3.97669
22.0005777869374	3.96478
22.0210217013955	4.01835
22.0414656158537	3.93948
22.0619095303118	3.92262
22.08235344477	3.95188
22.1027973592281	4.00496
22.1232412736863	4.09028
22.1436851881444	4.0878
22.1641291026026	4.08036
22.1845730170608	3.96131
22.2050169315189	4.00744
22.2254608459771	4.01339
22.2459047604352	3.91468
22.2663486748934	3.93204
22.2867925893515	3.91964
22.3072365038097	3.73859
22.3276804182678	3.83234
22.348124332726	3.94593
22.3685682471842	3.88294
22.3890121616423	3.9499
22.4094560761005	3.88839
22.4298999905586	3.85069
22.4503439050168	3.81597
22.4707878194749	3.89484
22.4912317339331	3.91766
22.5116756483912	3.91071
22.5321195628494	3.77034
22.5525634773076	3.6875
22.5730073917657	3.52034
22.5934513062239	3.65476
22.613895220682	3.7381
22.6343391351402	3.81349
22.6547830495983	3.77877
22.6752269640565	3.79315
22.6956708785146	3.84573
22.7161147929728	3.99355
22.736558707431	4.03125
22.7570026218891	4.0124
22.7774465363473	3.8626
22.7978904508054	3.84722
22.8183343652636	3.86855
22.8387782797217	3.77927
22.8592221941799	3.75744
22.879666108638	3.69891
22.9001100230962	3.61855
22.9205539375544	3.71181
22.9409978520125	3.85466
22.9614417664707	3.86706
22.9818856809288	3.83879
23.002329595387	3.70139
23.0227735098451	3.65278
23.0432174243033	3.67113
23.0636613387614	3.76637
23.0841052532196	3.78423
23.1045491676778	3.78571
23.1249930821359	3.71776
23.1454369965941	3.688
23.1658809110522	3.59524
23.1863248255104	3.53919
23.2067687399685	3.53819
23.2272126544267	3.71577
23.2476565688849	3.83631
23.268100483343	3.85714
23.2885443978012	3.78919
23.3089883122593	3.69891
23.3294322267175	3.65228
23.3498761411756	3.6622
23.3703200556338	3.88095
23.3907639700919	3.95486
23.4112078845501	3.93452
23.4316517990083	3.85565
23.4520957134664	3.75893
23.4725396279246	3.60317
23.4929835423827	3.79167
23.5134274568409	3.90377
23.533871371299	3.8626
23.5543152857572	3.73512
23.5747592002153	3.55208
23.5952031146735	3.37351
23.6156470291317	3.48859
23.6360909435898	3.72321
23.656534858048	3.86706
23.6769787725061	3.84722
23.6974226869643	3.73313
23.7178666014224	3.60962
23.7383105158806	3.61657
23.7587544303387	3.63988
23.7791983447969	3.73115
23.7996422592551	3.73065
23.8200861737132	3.83383
23.8405300881714	3.81349
23.8609740026295	3.81895
23.8814179170877	3.70883
23.9018618315458	3.5878
23.922305746004	3.53869
23.9427496604621	3.63294
23.9631935749203	3.57589
23.9836374893785	3.69147
24.0040814038366	3.59524
24.0245253182948	3.50942
24.0449692327529	3.63095
24.0654131472111	3.71429
24.0858570616692	3.66022
24.1063009761274	3.69742
24.1267448905855	3.52976
24.1471888050437	3.5
24.1676327195019	3.68601
24.18807663396	3.73016
24.2085205484182	3.7877
24.2289644628763	3.69692
24.2494083773345	3.5625
24.2698522917926	3.60665
24.2902962062508	3.70982
24.3107401207089	3.69147
24.3311840351671	3.73264
24.3516279496253	3.62103
24.3720718640834	3.59077
24.3925157785416	3.65724
24.4129596929997	3.67857
24.4334036074579	3.62946
24.453847521916	3.58681
24.4742914363742	3.61607
24.4947353508323	3.64038
24.5151792652905	3.62649
24.5356231797487	3.5248
24.5560670942068	3.38095
24.576511008665	3.45089
24.5969549231231	3.51786
24.6173988375813	3.65675
24.6378427520394	3.60367
24.6582866664976	3.51687
24.6787305809557	3.41766
24.6991744954139	3.5372
24.7196184098721	3.48462
24.7400623243302	3.56349
24.7605062387884	3.56448
24.7809501532465	3.61756
24.8013940677047	3.61905
24.8218379821628	3.69792
24.842281896621	3.64881
24.8627258110791	3.7128
24.8831697255373	3.70486
24.9036136399955	3.55208
24.9240575544536	3.44246
24.9445014689118	3.49355
24.9649453833699	3.55407
24.9853892978281	3.60962
25.0058332122862	3.50645
25.0262771267444	3.35218
25.0467210412025	3.29415
25.0671649556607	3.42312
25.0876088701189	3.56399
25.108052784577	3.5253
25.1284966990352	3.43204
25.1489406134933	3.45188
25.1693845279515	3.45734
25.1898284424096	3.5005
25.2102723568678	3.55308
25.2307162713259	3.625
25.2511601857841	3.60615
25.2716041002423	3.62351
25.2920480147004	3.55804
25.3124919291586	3.40526
25.3329358436167	3.42113
25.3533797580749	3.52183
25.373823672533	3.57341
25.3942675869912	3.64038
25.4147115014493	3.62748
25.4351554159075	3.58581
25.4555993303657	3.47272
25.4760432448238	3.35268
25.496487159282	3.40079
25.5169310737401	3.5
25.5373749881983	3.51687
25.5578189026564	3.54812
25.5782628171146	3.44494
25.5987067315727	3.38591
25.6191506460309	3.38591
25.6395945604891	3.3254
25.6600384749472	3.26141
25.6804823894054	3.35962
25.7009263038635	3.46329
25.7213702183217	3.50198
25.7418141327798	3.48214
25.762258047238	3.49206
25.7827019616961	3.4623
25.8031458761543	3.49554
25.8235897906125	3.42659
25.8440337050706	3.42609
25.8644776195288	3.40476
25.8849215339869	3.45833
25.9053654484451	3.56349
25.9258093629032	3.52034
25.9462532773614	3.44841
25.9666971918195	3.47966
25.9871411062777	3.34921
26.0075850207359	3.31349
26.028028935194	3.41468
26.0484728496522	3.39683
26.0689167641103	3.47173
26.0893606785685	3.46726
26.1098045930266	3.33581
26.1302485074848	3.28423
26.1506924219429	3.31944
26.1711363364011	3.28125
26.1915802508593	3.30655
26.2120241653174	3.38542
26.2324680797756	3.41518
26.2529119942337	3.4246
26.2733559086919	3.44593
26.29379982315	3.45238
26.3142437376082	3.38244
26.3346876520664	3.33036
26.3551315665245	3.28175
26.3755754809827	3.25446
26.3960193954408	3.2624
26.416463309899	3.34425
26.4369072243571	3.41419
26.4573511388153	3.35367
26.4777950532734	3.40774
26.4982389677316	3.4881
26.5186828821898	3.43254
26.5391267966479	3.41518
26.5595707111061	3.37748
26.5800146255642	3.39137
26.6004585400224	3.34772
26.6209024544805	3.37798
26.6413463689387	3.33829
26.6617902833968	3.28671
26.682234197855	3.14435
26.7026781123132	3.25248
26.7231220267713	3.31052
26.7435659412295	3.35466
26.7640098556876	3.46478
26.7844537701458	3.4256
26.8048976846039	3.23016
26.8253415990621	3.28919
26.8457855135202	3.34425
26.8662294279784	3.28274
26.8866733424366	3.3244
26.9071172568947	3.39583
26.9275611713529	3.33631
26.948005085811	3.54563
26.9684490002692	3.60913
26.9888929147273	3.54861
27.0093368291855	3.35516
27.0297807436436	3.2877
27.0502246581018	3.25149
27.07066857256	3.40923
27.0911124870181	3.48165
27.1115564014763	3.50099
27.1320003159344	3.42708
27.1524442303926	3.43403
27.1728881448507	3.42361
27.1933320593089	3.35119
27.213775973767	3.22272
27.2342198882252	3.12847
27.2546638026834	3.16171
27.2751077171415	3.24702
27.2955516315997	3.33532
27.3159955460578	3.40129
27.336439460516	3.36806
27.3568833749741	3.25694
27.3773272894323	3.28323
27.3977712038904	3.25
27.4182151183486	3.22917
27.4386590328068	3.20635
27.4591029472649	3.16171
27.4795468617231	3.17907
27.4999907761812	3.30308
27.5204346906394	3.26687
27.5408786050975	3.28075
27.5613225195557	3.14484
27.5817664340138	3.03621
27.602210348472	3.00397
27.6226542629302	3.05258
27.6430981773883	3.08681
27.6635420918465	3.16468
27.6839860063046	3.19097
27.7044299207628	3.11111
27.7248738352209	3.07788
27.7453177496791	3.10069
27.7657616641372	3.07589
27.7862055785954	3.03869
27.8066494930536	3.15179
27.8270934075117	2.98611
27.8475373219699	3.08482
27.867981236428	3.18056
27.8884251508862	3.12847
27.9088690653443	3.08333
27.9293129798025	3.19742
27.9497568942606	3.12302
27.9702008087188	3.28968
27.990644723177	3.28522
28.0110886376351	3.22917
28.0315325520933	3.16022
28.0519764665514	3.1126
28.0724203810096	3.10764
28.0928642954677	3.17163
28.1133082099259	3.11954
28.133752124384	3.21478
28.1541960388422	3.30159
28.1746399533004	3.20883
28.1950838677585	3.12351
28.2155277822167	3.05159
28.2359716966748	2.95536
28.256415611133	3.01736
28.2768595255911	2.98909
28.2973034400493	2.91468
28.3177473545074	2.85268
28.3381912689656	2.89087
28.3586351834238	2.96478
28.3790790978819	3.07738
28.3995230123401	3.05804
28.4199669267982	3.01587
28.4404108412564	2.9494
28.4608547557145	2.9876
28.4812986701727	3.11657
28.5017425846308	3.17312
28.522186499089	3.2381
28.5426304135472	3.16319
28.5630743280053	3.08433
28.5835182424635	2.96081
28.6039621569216	2.96528
28.6244060713798	2.89881
28.6448499858379	2.92609
28.6652939002961	2.91518
28.6857378147542	2.94891
28.7061817292124	2.86706
28.7266256436706	2.89038
28.7470695581287	2.99603
28.7675134725869	3.08978
28.787957387045	2.99355
28.8084013015032	2.96627
28.8288452159613	2.87054
28.8492891304195	2.79514
28.8697330448776	2.91815
28.8901769593358	3.03075
28.910620873794	2.94544
28.9310647882521	2.98909
28.9515087027103	3.04117
28.9719526171684	2.9871
28.9923965316266	2.88145
29.0128404460847	2.96677
29.0332843605429	2.93006
29.053728275001	2.99355
29.0741721894592	3.09871
29.0946161039174	3.00893
29.1150600183755	2.8006
29.1355039328337	2.75992
29.1559478472918	2.73313
29.17639176175	2.76637
29.1968356762081	2.76885
29.2172795906663	2.84474
29.2377235051245	2.79762
29.2581674195826	2.74256
29.2786113340408	2.7371
29.2990552484989	2.6379
29.3194991629571	2.56746
29.3399430774152	2.7123
29.3603869918734	2.78224
29.3808309063315	2.91071
29.4012748207897	2.89335
29.4217187352479	2.83681
29.442162649706	2.82986
29.4626065641642	2.80456
29.4830504786223	2.8125
29.5034943930805	2.77431
29.5239383075386	2.7128
29.5443822219968	2.62401
29.5648261364549	2.58383
29.5852700509131	2.6756
29.6057139653713	2.75794
29.6261578798294	2.69246
29.6466017942876	2.69444
29.6670457087457	2.51637
29.6874896232039	2.64038
29.707933537662	2.79266
29.7283774521202	2.74702
29.7488213665783	2.72718
29.7692652810365	2.60417
29.7897091954947	2.45486
29.8101531099528	2.58433
29.830597024411	2.67163
29.8510409388691	2.63839
29.8714848533273	2.76438
29.8919287677854	2.68304
29.9123726822436	2.69544
29.9328165967017	2.63492
29.9532605111599	2.56448
29.9737044256181	2.49206
29.9941483400762	2.5372
30.0145922545344	2.49901
30.0350361689925	2.58879
30.0554800834507	2.57837
30.0759239979088	2.51885
30.096367912367	2.51538
30.1168118268251	2.61409
30.1372557412833	2.68353
30.1576996557415	2.72669
30.1781435701996	2.65823
30.1985874846578	2.66766
30.2190313991159	2.65079
30.2394753135741	2.78968
30.2599192280322	2.91369
30.2803631424904	2.90179
30.3008070569485	2.79315
30.3212509714067	2.70734
30.3416948858649	2.56696
30.362138800323	2.58581
30.3825827147812	2.60367
30.4030266292393	2.60466
30.4234705436975	2.55308
30.4439144581556	2.42609
30.4643583726138	2.35119
30.4848022870719	2.37748
30.5052462015301	2.42808
30.5256901159883	2.51042
30.5461340304464	2.48165
30.5665779449046	2.36607
30.5870218593627	2.37946
30.6074657738209	2.44891
30.627909688279	2.56994
30.6483536027372	2.58284
30.6687975171953	2.57192
30.6892414316535	2.56498
30.7096853461117	2.55952
30.7301292605698	2.52827
30.750573175028	2.52877
30.7710170894861	2.45139
30.7914610039443	2.48562
30.8119049184024	2.63095
30.8323488328606	2.60665
30.8527927473187	2.62401
30.8732366617769	2.70833
30.8936805762351	2.81994
30.9141244906932	2.91567
30.9345684051514	3.09524
30.9550123196095	3.15228
30.9754562340677	3.55456
30.9959001485258	4.51786
31.016344062984	6.7619
31.0367879774421	11.314
31.0572318919003	16.3948
31.0776758063585	18.3299
31.0981197208166	17.2138
31.1185636352748	14.9216
31.1390075497329	12.1592
31.1594514641911	10.497
31.1798953786492	9.08333
31.2003392931074	6.41468
31.2207832075655	3.72917
31.2412271220237	2.84722
31.2616710364819	2.6994
31.28211495094	2.6999
31.3025588653982	2.69891
31.3230027798563	2.79464
31.3434466943145	2.70982
31.3638906087726	2.68948
31.3843345232308	2.65427
31.4047784376889	2.58284
31.4252223521471	2.50248
31.4456662666053	2.46329
31.4661101810634	2.39236
31.4865540955216	2.35218
31.5069980099797	2.29266
31.5274419244379	2.27877
31.547885838896	2.33185
31.5683297533542	2.44246
31.5887736678123	2.46875
31.6092175822705	2.43353
31.6296614967287	2.31796
31.6501054111868	2.29266
31.670549325645	2.25347
31.6909932401031	2.25149
31.7114371545613	2.26438
31.7318810690194	2.27679
31.7523249834776	2.34375
31.7727688979357	2.42113
31.7932128123939	2.41766
31.8136567268521	2.30208
31.8341006413102	2.18948
31.8545445557684	2.07688
31.8749884702265	1.96528
31.8954323846847	2.03075
31.9158762991428	2.12897
31.936320213601	2.19196
31.9567641280591	2.24653
31.9772080425173	2.2123
31.9976519569755	2.12252
32.0180958714336	2.19296
32.0385397858918	2.09077
32.0589837003499	2.09474
32.0794276148081	2.06746
32.0998715292662	1.98413
32.1203154437244	2.00546
32.1407593581825	2.02976
32.1612032726407	1.97966
32.1816471870989	1.97768
32.202091101557	1.99454
32.2225350160152	2.01091
32.2429789304733	2.07837
32.2634228449315	2.13145
32.2838667593896	2.18155
32.3043106738478	2.1131
32.324754588306	2.04415
32.3451985027641	2.0749
32.3656424172223	2.08829
32.3860863316804	2.1121
32.4065302461386	2.09722
32.4269741605967	2.01042
32.4474180750549	1.9499
32.467861989513	1.86954
32.4883059039712	1.82688
32.5087498184294	1.84673
32.5291937328875	1.83631
32.5496376473457	1.94891
32.5700815618038	2.04861
32.590525476262	2.01687
32.6109693907201	2.01935
32.6314133051783	1.9375
32.6518572196364	1.84474
32.6723011340946	1.8879
32.6927450485528	1.96726
32.7131889630109	1.95139
32.7336328774691	1.94891
32.7540767919272	1.89534
32.7745207063854	1.87103
32.7949646208435	1.92262
32.8154085353017	1.97569
32.8358524497598	2.01736
32.856296364218	1.95685
32.8767402786762	1.937
32.8971841931343	1.84524
32.9176281075925	1.71825
32.9380720220506	1.66319
32.9585159365088	1.6746
32.9789598509669	1.70238
32.9994037654251	1.81052
33.0198476798832	1.83879
33.0402915943414	2.0253
33.0607355087996	2.47123
33.0811794232577	2.63938
33.1016233377159	2.78224
33.122067252174	2.61359
33.1425111666322	2.30853
33.1629550810903	2.28075
33.1833989955485	2.34524
33.2038429100066	2.17063
33.2242868244648	2.06597
33.244730738923	1.83135
33.2651746533811	1.74256
33.2856185678393	1.8006
33.3060624822974	1.81746
33.3265063967556	1.82589
33.3469503112137	1.78919
33.3673942256719	1.75
33.38783814013	1.73611
33.4082820545882	1.71379
33.4287259690464	1.61657
33.4491698835045	1.63492
33.4696137979627	1.57937
33.4900577124208	1.64435
33.510501626879	1.67857
33.5309455413371	1.76141
33.5513894557953	1.7629
33.5718333702534	1.74851
33.5922772847116	1.64931
33.6127211991698	1.58532
33.6331651136279	1.57589
33.6536090280861	1.63542
33.6740529425442	1.75248
33.6944968570024	1.7996
33.7149407714605	1.74405
33.7353846859187	1.66369
33.7558286003768	1.59077
33.776272514835	1.4881
33.7967164292932	1.54911
33.8171603437513	1.64435
33.8376042582095	1.68204
33.8580481726676	1.6756
33.8784920871258	1.65179
33.8989360015839	1.54315
33.9193799160421	1.52629
33.9398238305002	1.4494
33.9602677449584	1.51538
33.9807116594166	1.54216
34.0011555738747	1.60764
34.0215994883329	1.57986
34.042043402791	1.54762
34.0624873172492	1.46329
34.0829312317073	1.53472
34.1033751461655	1.47817
34.1238190606236	1.40972
34.1442629750818	1.34028
34.16470688954	1.3502
34.1851508039981	1.37996
34.2055947184563	1.47272
34.2260386329144	1.42857
34.2464825473726	1.39484
34.2669264618307	1.36359
34.2873703762889	1.42857
34.307814290747	1.45288
34.3282582052052	1.55804
34.3487021196634	1.57192
34.3691460341215	1.62302
34.3895899485797	1.563
34.4100338630378	1.53522
34.430477777496	1.45089
34.4509216919541	1.4752
34.4713656064123	1.42113
34.4918095208704	1.46627
34.5122534353286	1.51488
34.5326973497868	1.52034
34.5531412642449	1.51835
34.5735851787031	1.5372
34.5940290931612	1.44841
34.6144730076194	1.39881
34.6349169220775	1.39385
34.6553608365357	1.37351
34.6758047509938	1.38294
34.696248665452	1.438
34.7166925799102	1.45833
34.7371364943683	1.40972
34.7575804088265	1.39385
34.7780243232846	1.39038
34.7984682377428	1.40873
34.8189121522009	1.42758
34.8393560666591	1.42312
34.8597999811172	1.39236
34.8802438955754	1.36855
34.9006878100336	1.36706
34.9211317244917	1.39633
34.9415756389499	1.42312
34.962019553408	1.45536
34.9824634678662	1.44593
35.0029073823243	1.34673
35.0233512967825	1.32192
35.0437952112406	1.31845
35.0642391256988	1.33234
35.084683040157	1.32589
35.1051269546151	1.26587
35.1255708690733	1.22024
35.1460147835314	1.25843
35.1664586979896	1.28323
35.1869026124477	1.26438
35.2073465269059	1.23562
35.2277904413641	1.23562
35.2482343558222	1.24603
35.2686782702804	1.17063
35.2891221847385	1.15526
35.3095660991967	1.13542
35.3300100136548	1.12202
35.350453928113	1.28075
35.3708978425711	1.3631
35.3913417570293	1.32639
35.4117856714875	1.33085
35.4322295859456	1.28522
35.4526735004038	1.19841
35.4731174148619	1.25496
35.4935613293201	1.25198
35.5140052437782	1.28621
35.5344491582364	1.30903
35.5548930726945	1.34524
35.5753369871527	1.30704
35.5957809016109	1.30208
35.616224816069	1.31597
35.6366687305272	1.34573
35.6571126449853	1.36558
35.6775565594435	1.35962
35.6980004739016	1.3249
35.7184443883598	1.26835
35.7388883028179	1.24405
35.7593322172761	1.22073
35.7797761317343	1.22222
35.8002200461924	1.20139
35.8206639606506	1.26389
35.8411078751087	1.2619
35.8615517895669	1.18651
35.881995704025	1.12202
35.9024396184832	1.10615
35.9228835329413	1.09375
35.9433274473995	1.19792
35.9637713618577	1.18452
35.9842152763158	1.18651
36.004659190774	1.23313
36.0251031052321	1.32738
36.0455470196903	1.34077
36.0659909341484	1.35962
36.0864348486066	1.24504
36.1068787630647	1.23661
36.1273226775229	1.28125
36.1477665919811	1.34375
36.1682105064392	1.32044
36.1886544208974	1.26984
36.2090983353555	1.25397
36.2295422498137	1.22669
36.2499861642718	1.15278
36.27043007873	1.15129
36.2908739931881	1.17212
36.3113179076463	1.21528
36.3317618221045	1.22669
36.3522057365626	1.19395
36.3726496510208	1.12103
36.3930935654789	1.13442
36.4135374799371	1.20337
36.4339813943952	1.21825
36.4544253088534	1.19246
36.4748692233115	1.17163
36.4953131377697	1.1751
36.5157570522279	1.13393
36.536200966686	1.12748
36.5566448811442	1.02927
36.5770887956023	1.03919
36.5975327100605	1.01687
36.6179766245186	1.08681
36.6384205389768	1.13839
36.6588644534349	1.24603
36.6793083678931	1.20486
36.6997522823513	1.18452
36.7201961968094	1.10516
36.7406401112676	1.06944
36.7610840257257	1.04216
36.7815279401839	1.12054
36.801971854642	1.09325
36.8224157691002	1.10268
36.8428596835583	1.09375
36.8633035980165	1.05853
36.8837475124747	1.03224
36.9041914269328	1.06895
36.924635341391	1.0878
36.9450792558491	1.09623
36.9655231703073	1.12153
36.9859670847654	1.10962
37.0064109992236	1.07589
37.0268549136817	1.03423
37.0472988281399	1.04712
37.0677427425981	1.00099
37.0881866570562	1.08284
37.1086305715144	1.1503
37.1290744859725	1.23661
37.1495184004307	1.19246
37.1699623148888	1.14236
37.190406229347	1.04911
37.2108501438051	1.062
37.2312940582633	0.995536
37.2517379727215	1.05456
37.2721818871796	1.04067
37.2926258016378	1.07937
37.3130697160959	1.06002
37.3335136305541	1.06647
37.3539575450122	0.990079
37.3744014594704	0.945437
37.3948453739285	0.934028
37.4152892883867	1.01538
37.4357332028449	1.03571
37.456177117303	1.0501
37.4766210317612	1.05159
37.4970649462193	1.02579
37.5175088606775	1.0119
37.5379527751356	1.05308
37.5583966895938	1.09722
37.5788406040519	1.04216
37.5992845185101	1.02381
37.6197284329683	0.998512
37.6401723474264	1.03423
37.6606162618846	1.07837
37.6810601763427	1.09375
37.7015040908009	1.063
37.721948005259	1.09276
37.7423919197172	1.01984
37.7628358341753	1.07887
37.7832797486335	1.08929
37.8037236630917	1.0754
37.8241675775498	1.1245
37.844611492008	1.13492
37.8650554064661	1.08829
37.8854993209243	1.06399
37.9059432353824	0.982143
37.9263871498406	0.957341
37.9468310642987	0.975198
37.9672749787569	0.952877
37.9877188932151	1.00099
38.0081628076732	0.97371
38.0286067221314	0.910714
38.0490506365895	0.87748
38.0694945510477	0.840278
38.0899384655058	0.81746
38.110382379964	0.826885
38.1308262944222	0.836806
38.1512702088803	0.880952
38.1717141233385	0.920139
38.1921580377966	0.892361
38.2126019522548	0.847718
38.2330458667129	0.892361
38.2534897811711	0.917659
38.2739336956292	0.982143
38.2943776100874	1.04911
38.3148215245456	0.983631
38.3352654390037	0.931548
38.3557093534619	0.993552
38.37615326792	0.957837
38.3965971823782	0.919147
38.4170410968363	0.915179
38.4374850112945	0.886409
38.4579289257526	0.887401
38.4783728402108	0.885913
38.498816754669	0.907738
38.5192606691271	0.926587
38.5397045835853	0.914683
38.5601484980434	0.940972
38.5805924125016	0.963294
38.6010363269597	0.975694
38.6214802414179	1.00397
38.641924155876	1.02629
38.6623680703342	0.946429
38.6828119847924	0.90377
38.7032558992505	0.891369
38.7236998137087	0.895337
38.7441437281668	0.855655
38.764587642625	0.865079
38.7850315570831	0.886409
38.8054754715413	0.907738
38.8259193859994	0.956845
38.8463633004576	0.99752
38.8668072149158	0.956845
38.8872511293739	0.88244
38.9076950438321	0.891865
38.9281389582902	0.858631
38.9485828727484	0.84623
38.9690267872065	0.867063
38.9894707016647	0.921627
39.0099146161228	0.934524
39.030358530581	0.926091
39.0508024450392	0.915675
39.0712463594973	0.824901
39.0916902739555	0.812996
39.1121341884136	0.83631
39.1325781028718	0.817956
39.1530220173299	0.78373
39.1734659317881	0.78869
39.1939098462462	0.765377
39.2143537607044	0.865079
39.2347976751626	0.89881
39.2552415896207	0.849702
39.2756855040789	0.820933
39.296129418537	0.814484
39.3165733329952	0.815972
39.3370172474533	0.83879
39.3574611619115	0.856151
39.3779050763696	0.837798
39.3983489908278	0.85119
39.418792905286	0.87252
39.4392368197441	0.813988
39.4596807342023	0.768353
39.4801246486604	0.760417
39.5005685631186	0.80754
39.5210124775767	0.869544
39.5414563920349	0.880456
39.561900306493	0.84375
39.5823442209512	0.847718
39.6027881354094	0.850694
39.6232320498675	0.844742
39.6436759643257	0.814484
39.6641198787838	0.791667
39.684563793242	0.798115
39.7050077077001	0.827381
39.7254516221583	0.894345
39.7458955366164	0.88244
39.7663394510746	0.834325
39.7867833655328	0.769841
39.8072272799909	0.774802
39.8276711944491	0.822421
39.8481151089072	0.864087
39.8685590233654	0.839286
39.8890029378235	0.791667
39.9094468522817	0.717262
39.9298907667398	0.718254
39.950334681198	0.761905
39.9707785956562	0.737103
39.9912225101143	0.792659
40.0116664245725	0.840774
40.0321103390306	0.869544
40.0525542534888	0.85119
40.0729981679469	0.849206
40.0934420824051	0.774802
40.1138859968632	0.796627
40.1343299113214	0.786706
40.1547738257796	0.748016
40.1752177402377	0.728175
40.1956616546959	0.729663
40.216105569154	0.720734
40.2365494836122	0.739087
40.2569933980703	0.724206
40.2774373125285	0.673611
40.2978812269866	0.72123
40.3183251414448	0.737103
40.338769055903	0.764881
40.3592129703611	0.758433
40.3796568848193	0.703373
40.4001007992774	0.667163
40.4205447137356	0.669147
40.4409886281937	0.69246
40.4614325426519	0.719742
40.48187645711	0.737599
40.5023203715682	0.691964
40.5227642860264	0.710317
40.5432082004845	0.727679
40.5636521149427	0.784722
40.5840960294008	0.827381
40.604539943859	0.844246
40.6249838583171	0.760417
40.6454277727753	0.727183
40.6658716872334	0.722718
40.6863156016916	0.738591
40.7067595161498	0.760913
40.7272034306079	0.75248
40.7476473450661	0.751984
40.7680912595242	0.710813
40.7885351739824	0.697917
40.8089790884405	0.705357
40.8294230028987	0.705853
40.8498669173568	0.695437
40.870310831815	0.692956
40.8907547462732	0.660218
40.9111986607313	0.632937
40.9316425751895	0.646329
40.9520864896476	0.630456
40.9725304041058	0.692956
40.9929743185639	0.696429
41.0134182330221	0.721726
41.0338621474802	0.689484
41.0543060619384	0.644345
41.0747499763966	0.600198
41.0951938908547	0.632937
41.1156378053129	0.644841
41.136081719771	0.680556
41.1565256342292	0.676587
41.1769695486873	0.633433
41.1974134631455	0.646825
41.2178573776037	0.611607
41.2383012920618	0.650794
41.25874520652	0.648313
41.2791891209781	0.658234
41.2996330354363	0.657242
41.3200769498944	0.660218
41.3405208643526	0.62004
41.3609647788107	0.644345
41.3814086932689	0.625496
41.4018526077271	0.644345
41.4222965221852	0.640873
41.4427404366434	0.65129
41.4631843511015	0.665179
41.4836282655597	0.675099
41.5040721800178	0.666171
41.524516094476	0.660218
41.5449600089341	0.62252
41.5654039233923	0.636905
41.5858478378505	0.709821
41.6062917523086	0.734127
41.6267356667668	0.689484
41.6471795812249	0.674603
41.6676234956831	0.657242
41.6880674101412	0.672619
41.7085113245994	0.722222
41.7289552390575	0.729663
41.7493991535157	0.674603
41.7698430679739	0.645833
41.790286982432	0.610615
41.8107308968902	0.590774
41.8311748113483	0.601687
41.8516187258065	0.643849
41.8720626402646	0.612599
41.8925065547228	0.616071
41.9129504691809	0.660218
41.9333943836391	0.69494
41.9538382980973	0.71131
41.9742822125554	0.679067
41.9947261270136	0.618056
42.0151700414717	0.564484
42.0356139559299	0.581845
42.056057870388	0.601687
42.0765017848462	0.554067
42.0969456993043	0.500496
42.1173896137625	0.568452
42.1378335282207	0.560516
42.1582774426788	0.642361
42.178721357137	0.705853
42.1991652715951	0.715774
42.2196091860533	0.688492
42.2400531005114	0.719742
42.2604970149696	0.642361
42.2809409294277	0.628472
42.3013848438859	0.615079
42.3218287583441	0.62004
42.3422726728022	0.585317
42.3627165872604	0.637401
42.3831605017185	0.641369
42.4036044161767	0.643353
42.4240483306348	0.666667
42.444492245093	0.660218
42.4649361595511	0.614583
42.4853800740093	0.647817
42.5058239884675	0.635913
42.5262679029256	0.662698
42.5467118173838	0.665675
42.5671557318419	0.65129
42.5875996463001	0.622024
42.6080435607582	0.648313
42.6284874752164	0.614087
42.6489313896745	0.588294
42.6693753041327	0.605655
42.6898192185909	0.622024
42.710263133049	0.614583
42.7307070475072	0.668651
42.7511509619653	0.660218
42.7715948764235	0.617063
42.7920387908816	0.626984
42.8124827053398	0.59871
42.8329266197979	0.59127
42.8533705342561	0.580357
42.8738144487143	0.595238
42.8942583631724	0.603671
42.9147022776306	0.629464
42.9351461920887	0.676091
42.9555901065469	0.698413
42.976034021005	0.633929
42.9964779354632	0.59623
43.0169218499213	0.55754
43.0373657643795	0.5625
43.0578096788377	0.614583
43.0782535932958	0.618552
43.098697507754	0.570933
43.1191414222121	0.575397
43.1395853366703	0.584821
43.1600292511284	0.531746
43.1804731655866	0.566468
43.2009170800447	0.570437
43.2213609945029	0.546627
43.2418049089611	0.530258
43.2622488234192	0.506448
43.2826927378774	0.476687
43.3031366523355	0.565476
43.3235805667937	0.59871
43.3440244812518	0.590278
43.36446839571	0.55754
43.3849123101681	0.562996
43.4053562246263	0.594246
43.4258001390845	0.637401
43.4462440535426	0.610615
43.4666879680008	0.56498
43.4871318824589	0.587302
43.5075757969171	0.644345
43.5280197113752	0.636905
43.5484636258334	0.589286
43.5689075402915	0.552083
43.5893514547497	0.509425
43.6097953692079	0.542163
43.630239283666	0.59623
43.6506831981242	0.607143
43.6711271125823	0.576389
43.6915710270405	0.601687
43.7120149414986	0.594246
43.7324588559568	0.591766
43.7529027704149	0.59871
43.7733466848731	0.605159
43.7937905993313	0.537202
43.8142345137894	0.472718
43.8346784282476	0.489087
43.8551223427057	0.533234
43.8755662571639	0.612103
43.896010171622	0.68006
43.9164540860802	0.663194
43.9368980005383	0.576389
43.9573419149965	0.542163
43.9777858294547	0.56498
43.9982297439128	0.532738
44.018673658371	0.519841
44.0391175728291	0.504464
44.0595614872873	0.518353
44.0800054017454	0.539187
44.1004493162036	0.604663
44.1208932306618	0.566964
44.1413371451199	0.559524
44.1617810595781	0.533234
44.1822249740362	0.514881
44.2026688884944	0.521825
44.2231128029525	0.55754
44.2435567174107	0.544643
44.2640006318688	0.551587
44.284444546327	0.558532
44.3048884607852	0.517361
44.3253323752433	0.537202
44.3457762897015	0.53373
44.3662202041596	0.554563
44.3866641186178	0.570933
44.4071080330759	0.614583
44.4275519475341	0.597718
44.4479958619922	0.622024
44.4684397764504	0.572917
44.4888836909086	0.559524
44.5093276053667	0.542163
44.5297715198249	0.560516
44.550215434283	0.56002
44.5706593487412	0.586806
44.5911032631993	0.544147
44.6115471776575	0.554563
44.6319910921156	0.504464
44.6524350065738	0.486607
44.672878921032	0.500496
44.6933228354901	0.492063
44.7137667499483	0.474702
44.7342106644064	0.482143
44.7546545788646	0.44494
44.7750984933227	0.44494
44.7955424077809	0.506448
44.815986322239	0.524306
44.8364302366972	0.511905
44.8568741511554	0.455853
44.8773180656135	0.490079
44.8977619800717	0.535218
44.9182058945298	0.616567
44.938649808988	0.600198
44.9590937234461	0.535218
44.9795376379043	0.493056
44.9999815523624	0.498512
45.0204254668206	0.537698
45.0408693812788	0.570437
45.0613132957369	0.549603
45.0817572101951	0.539683
45.1022011246532	0.553075
45.1226450391114	0.514385
45.1430889535695	0.494048
45.1635328680277	0.502976
45.1839767824858	0.490575
45.204420696944	0.46875
45.2248646114022	0.462798
45.2453085258603	0.447917
45.2657524403185	0.437004
45.2861963547766	0.457341
45.3066402692348	0.442956
45.3270841836929	0.449405
45.3475280981511	0.459325
45.3679720126092	0.50744
45.3884159270674	0.50744
45.4088598415256	0.496032
45.4293037559837	0.47619
45.4497476704419	0.485119
45.4701915849	0.487103
45.4906354993582	0.519841
45.5110794138163	0.516369
45.5315233282745	0.55754
45.5519672427326	0.541171
45.5724111571908	0.482639
45.592855071649	0.502976
45.6132989861071	0.5
45.6337429005653	0.521825
45.6541868150234	0.53621
45.6746307294816	0.517361
45.6950746439397	0.490575
45.7155185583979	0.522321
45.735962472856	0.490575
45.7564063873142	0.490079
45.7768503017724	0.458829
45.7972942162305	0.495536
45.8177381306887	0.497024
45.8381820451468	0.512897
45.858625959605	0.512401
45.8790698740631	0.495536
45.8995137885213	0.52381
45.9199577029794	0.553075
45.9404016174376	0.506944
45.9608455318958	0.515873
45.9812894463539	0.501984
46.0017333608121	0.472718
46.0221772752702	0.491071
46.0426211897284	0.556052
46.0630651041865	0.568948
46.0835090186447	0.621528
46.1039529331028	0.581349
46.124396847561	0.525298
46.1448407620192	0.458333
46.1652846764773	0.445437
46.1857285909355	0.43254
46.2061725053936	0.481151
46.2266164198518	0.465774
46.2470603343099	0.524802
46.2675042487681	0.515377
46.2879481632262	0.532242
46.3083920776844	0.547619
46.3288359921426	0.539683
46.3492799066007	0.496528
46.3697238210589	0.498016
46.390167735517	0.44494
46.4106116499752	0.46379
46.4310555644333	0.475694
46.4514994788915	0.481647
46.4719433933496	0.459325
46.4923873078078	0.425099
46.512831222266	0.395833
46.5332751367241	0.392857
46.5537190511823	0.421627
46.5741629656404	0.458333
46.5946068800986	0.457341
46.6150507945567	0.476687
46.6354947090149	0.49504
46.655938623473	0.531746
46.6763825379312	0.530754
46.6968264523894	0.519841
46.7172703668475	0.481647
46.7377142813057	0.459821
46.7581581957638	0.453869
46.778602110222	0.448413
46.7990460246801	0.431548
46.8194899391383	0.473214
46.8399338535964	0.483135
46.8603777680546	0.504464
46.8808216825128	0.490575
46.9012655969709	0.468254
46.9217095114291	0.412698
46.9421534258872	0.439484
46.9625973403454	0.414187
46.9830412548035	0.437996
47.0034851692617	0.434028
47.0239290837199	0.451389
47.044372998178	0.418651
47.0648169126362	0.43998
47.0852608270943	0.436508
47.1057047415525	0.493552
47.1261486560106	0.483631
47.1465925704688	0.453373
47.1670364849269	0.447421
47.1874803993851	0.43502
47.2079243138433	0.448413
47.2283682283014	0.47123
47.2488121427596	0.469246
47.2692560572177	0.480159
47.2896999716759	0.528274
47.310143886134	0.527282
47.3305878005922	0.545139
47.3510317150503	0.512897
47.3714756295085	0.532738
47.3919195439667	0.614087
47.4123634584248	0.623016
47.432807372883	0.559524
47.4532512873411	0.500992
47.4736952017993	0.436508
47.4941391162574	0.400794
47.5145830307156	0.444444
47.5350269451737	0.416171
47.5554708596319	0.421131
47.5759147740901	0.404762
47.5963586885482	0.43006
47.6168026030064	0.41369
47.6372465174645	0.419147
47.6576904319227	0.406746
47.6781343463808	0.443452
47.698578260839	0.500992
47.7190221752971	0.518849
47.7394660897553	0.501984
47.7599100042135	0.472222
47.7803539186716	0.429067
47.8007978331298	0.406746
47.8212417475879	0.43502
47.8416856620461	0.357143
47.8621295765042	0.35119
47.8825734909624	0.358631
47.9030174054205	0.387897
47.9234613198787	0.484127
47.9439052343369	0.532738
47.964349148795	0.526786
47.9847930632532	0.534226
48.0052369777113	0.510417
48.0256808921695	0.460813
48.0461248066276	0.46875
48.0665687210858	0.454861
48.0870126355439	0.418651
48.1074565500021	0.402778
48.1279004644603	0.429067
48.1483443789184	0.445933
48.1687882933766	0.449405
48.1892322078347	0.467758
48.2096761222929	0.427579
48.230120036751	0.4375
48.2505639512092	0.464782
48.2710078656673	0.445437
48.2914517801255	0.407738
48.3118956945837	0.416171
48.3323396090418	0.41369
48.3527835235	0.448413
48.3732274379581	0.4375
48.3936713524163	0.434028
48.4141152668744	0.439484
48.4345591813326	0.470238
48.4550030957907	0.481647
48.4754470102489	0.512897
48.4958909247071	0.503472
48.5163348391652	0.537202
48.5367787536234	0.53621
48.5572226680815	0.50744
48.5776665825397	0.484127
48.5981104969978	0.443948
48.618554411456	0.40129
48.6389983259141	0.40377
48.6594422403723	0.376488
48.6798861548305	0.375496
48.7003300692886	0.409722
48.7207739837468	0.448909
48.7412178982049	0.49752
48.7616618126631	0.530754
48.7821057271212	0.475694
48.8025496415794	0.487103
48.8229935560375	0.513889
48.8434374704957	0.548611
48.8638813849539	0.525794
48.884325299412	0.467758
48.9047692138702	0.41121
48.9252131283283	0.434028
48.9456570427865	0.464782
48.9661009572446	0.506448
48.9865448717028	0.484623
49.0069887861609	0.455357
49.0274327006191	0.487103
49.0478766150773	0.513393
49.0683205295354	0.491071
49.0887644439936	0.468254
49.1092083584517	0.417163
49.1296522729099	0.391369
49.150096187368	0.404266
49.1705401018262	0.419147
49.1909840162843	0.453373
49.2114279307425	0.43998
49.2318718452007	0.43502
49.2523157596588	0.426587
49.272759674117	0.419643
49.2932035885751	0.394841
49.3136475030333	0.398313
49.3340914174914	0.415675
49.3545353319496	0.425099
49.3749792464077	0.429563
49.3954231608659	0.458829
49.4158670753241	0.446925
49.4363109897822	0.457837
49.4567549042404	0.449901
49.4771988186985	0.414187
49.4976427331567	0.361111
49.5180866476148	0.367063
49.538530562073	0.358631
49.5589744765311	0.437996
49.5794183909893	0.46627
49.5998623054475	0.478175
49.6203062199056	0.469246
49.6407501343638	0.447917
49.6611940488219	0.428075
49.6816379632801	0.405754
49.7020818777382	0.390377
49.7225257921964	0.369544
49.7429697066545	0.408234
49.7634136211127	0.41369
49.7838575355709	0.450397
49.804301450029	0.391369
49.8247453644872	0.364087
49.8451892789453	0.321429
49.8656331934035	0.331845
49.8860771078616	0.369048
49.9065210223198	0.404762
49.9269649367779	0.420139
49.9474088512361	0.433532
49.9678527656943	0.405754
49.9882966801524	0.409722
50.0087405946106	0.419643
50.0291845090687	0.433036
50.0496284235269	0.462302
50.070072337985	0.428075
50.0905162524432	0.385913
50.1109601669014	0.371528
50.1314040813595	0.33879
50.1518479958177	0.395833
50.1722919102758	0.462302
50.192735824734	0.480655
50.2131797391921	0.453373
50.2336236536503	0.429067
50.2540675681084	0.383929
50.2745114825666	0.402778
50.2949553970248	0.414187
50.3153993114829	0.447421
50.3358432259411	0.444444
50.3562871403992	0.416667
50.3767310548574	0.43254
50.3971749693155	0.429067
50.4176188837737	0.401786
50.4380627982318	0.427083
50.45850671269	0.451885
50.4789506271482	0.44494
50.4993945416063	0.491071
50.5198384560645	0.482639
50.5402823705226	0.446925
50.5607262849808	0.422619
50.5811701994389	0.411706
50.6016141138971	0.378968
50.6220580283552	0.429563
50.6425019428134	0.436012
50.6629458572716	0.417659
50.6833897717297	0.401786
50.7038336861879	0.376488
50.724277600646	0.363095
50.7447215151042	0.377976
50.7651654295623	0.384425
50.7856093440205	0.412202
50.8060532584786	0.421627
50.8264971729368	0.431548
50.846941087395	0.43254
[truncated: 1,913 more rows]

## Sheet: FTIR PC
cm-1	%T
4000	100.87
3999	100.88
3998	100.88
3997	100.88
3996	100.88
3995	100.87
3994	100.87
3993	100.87
3992	100.88
3991	100.88
3990	100.87
3989	100.87
3988	100.86
3987	100.86
3986	100.86
3985	100.87
3984	100.87
3983	100.87
3982	100.87
3981	100.88
3980	100.89
3979	100.89
3978	100.89
3977	100.89
3976	100.89
3975	100.89
3974	100.89
3973	100.89
3972	100.89
3971	100.88
3970	100.88
3969	100.88
3968	100.88
3967	100.88
3966	100.88
3965	100.88
3964	100.89
3963	100.89
3962	100.89
3961	100.9
3960	100.9
3959	100.89
3958	100.89
3957	100.89
3956	100.9
3955	100.91
3954	100.92
3953	100.92
3952	100.92
3951	100.92
3950	100.92
3949	100.91
3948	100.9
3947	100.89
3946	100.88
3945	100.88
3944	100.88
3943	100.89
3942	100.89
3941	100.89
3940	100.89
3939	100.89
3938	100.89
3937	100.88
3936	100.88
3935	100.89
3934	100.89
3933	100.89
3932	100.89
3931	100.9
3930	100.91
3929	100.92
3928	100.93
3927	100.93
3926	100.93
3925	100.93
3924	100.92
3923	100.92
3922	100.91
3921	100.9
3920	100.9
3919	100.9
3918	100.91
3917	100.91
3916	100.91
3915	100.91
3914	100.92
3913	100.92
3912	100.92
3911	100.92
3910	100.91
3909	100.91
3908	100.9
3907	100.9
3906	100.9
3905	100.9
3904	100.9
3903	100.9
3902	100.89
3901	100.89
3900	100.89
3899	100.91
3898	100.93
3897	100.94
3896	100.94
3895	100.94
3894	100.94
3893	100.95
3892	100.96
3891	100.96
3890	100.95
3889	100.94
3888	100.93
3887	100.92
3886	100.91
3885	100.9
3884	100.9
3883	100.9
3882	100.91
3881	100.91
3880	100.92
3879	100.93
3878	100.92
3877	100.92
3876	100.9
3875	100.9
3874	100.9
3873	100.9
3872	100.91
3871	100.91
3870	100.91
3869	100.92
3868	100.93
3867	100.94
3866	100.95
3865	100.95
3864	100.94
3863	100.94
3862	100.95
3861	100.95
3860	100.95
3859	100.95
3858	100.95
3857	100.94
3856	100.93
3855	100.92
3854	100.92
3853	100.92
3852	100.91
3851	100.91
3850	100.91
3849	100.91
3848	100.92
3847	100.93
3846	100.94
3845	100.94
3844	100.94
3843	100.93
3842	100.92
3841	100.92
3840	100.92
3839	100.92
3838	100.93
3837	100.94
3836	100.94
3835	100.95
3834	100.95
3833	100.95
3832	100.94
3831	100.93
3830	100.93
3829	100.93
3828	100.93
3827	100.93
3826	100.93
3825	100.93
3824	100.94
3823	100.95
3822	100.97
3821	100.99
3820	100.99
3819	100.97
3818	100.94
3817	100.92
3816	100.92
3815	100.93
3814	100.94
3813	100.94
3812	100.94
3811	100.93
3810	100.93
3809	100.93
3808	100.93
3807	100.93
3806	100.92
3805	100.92
3804	100.92
3803	100.92
3802	100.92
3801	100.93
3800	100.95
3799	100.96
3798	100.96
3797	100.96
3796	100.95
3795	100.95
3794	100.95
3793	100.95
3792	100.95
3791	100.94
3790	100.94
3789	100.94
3788	100.95
3787	100.96
3786	100.96
3785	100.95
3784	100.95
3783	100.95
3782	100.94
3781	100.94
3780	100.93
3779	100.92
3778	100.93
3777	100.94
3776	100.95
3775	100.95
3774	100.94
3773	100.93
3772	100.93
3771	100.93
3770	100.94
3769	100.95
3768	100.94
3767	100.92
3766	100.91
3765	100.91
3764	100.91
3763	100.92
3762	100.94
3761	100.95
3760	100.96
3759	100.97
3758	100.96
3757	100.96
3756	100.95
3755	100.95
3754	100.96
3753	100.97
3752	100.97
3751	100.96
3750	100.94
3749	100.93
3748	100.94
3747	100.93
3746	100.92
3745	100.91
3744	100.9
3743	100.91
3742	100.92
3741	100.93
3740	100.93
3739	100.94
3738	100.94
3737	100.95
3736	100.96
3735	100.96
3734	100.95
3733	100.94
3732	100.93
3731	100.93
3730	100.95
3729	100.97
3728	100.99
3727	101.01
3726	101.03
3725	101.04
3724	101.04
3723	101.04
3722	101.02
3721	101
3720	100.98
3719	100.97
3718	100.97
3717	100.97
3716	100.98
3715	100.99
3714	101
3713	101.01
3712	101.01
3711	101.01
3710	100.99
3709	100.98
3708	100.97
3707	100.97
3706	100.97
3705	100.98
3704	100.99
3703	100.99
3702	100.99
3701	100.98
3700	100.97
3699	100.97
3698	100.97
3697	100.97
3696	100.97
3695	100.97
3694	100.96
3693	100.96
3692	100.97
3691	100.98
3690	101
3689	101
3688	100.98
3687	100.96
3686	100.94
3685	100.94
3684	100.94
3683	100.95
3682	100.96
3681	100.96
3680	100.95
3679	100.94
3678	100.93
3677	100.93
3676	100.92
3675	100.92
3674	100.9
3673	100.88
3672	100.86
3671	100.84
3670	100.84
3669	100.85
3668	100.87
3667	100.89
3666	100.91
3665	100.93
3664	100.93
3663	100.91
3662	100.89
3661	100.86
3660	100.84
3659	100.84
3658	100.86
3657	100.88
3656	100.89
3655	100.89
3654	100.89
3653	100.89
3652	100.9
3651	100.91
3650	100.91
3649	100.9
3648	100.89
3647	100.9
3646	100.91
3645	100.92
3644	100.92
3643	100.91
3642	100.91
3641	100.9
3640	100.9
3639	100.89
3638	100.89
3637	100.89
3636	100.88
3635	100.88
3634	100.88
3633	100.88
3632	100.89
3631	100.88
3630	100.86
3629	100.84
3628	100.83
3627	100.84
3626	100.85
3625	100.86
3624	100.86
3623	100.86
3622	100.87
3621	100.87
3620	100.88
3619	100.87
3618	100.84
3617	100.82
3616	100.79
3615	100.77
3614	100.75
3613	100.74
3612	100.73
3611	100.74
3610	100.75
3609	100.76
3608	100.77
3607	100.77
3606	100.76
3605	100.76
3604	100.76
3603	100.75
3602	100.75
3601	100.75
3600	100.75
3599	100.74
3598	100.73
3597	100.71
3596	100.7
3595	100.68
3594	100.67
3593	100.67
3592	100.67
3591	100.67
3590	100.68
3589	100.69
3588	100.69
3587	100.69
3586	100.67
3585	100.65
3584	100.64
3583	100.64
3582	100.63
3581	100.64
3580	100.64
3579	100.64
3578	100.64
3577	100.64
3576	100.63
3575	100.62
3574	100.62
3573	100.62
3572	100.61
3571	100.61
3570	100.6
3569	100.58
3568	100.57
3567	100.56
3566	100.55
3565	100.54
3564	100.54
3563	100.55
3562	100.55
3561	100.56
3560	100.56
3559	100.56
3558	100.55
3557	100.53
3556	100.52
3555	100.52
3554	100.52
3553	100.52
3552	100.52
3551	100.5
3550	100.49
3549	100.48
3548	100.47
3547	100.47
3546	100.47
3545	100.46
3544	100.45
3543	100.45
3542	100.45
3541	100.45
3540	100.44
3539	100.43
3538	100.41
3537	100.4
3536	100.4
3535	100.4
3534	100.41
3533	100.42
3532	100.42
3531	100.42
3530	100.41
3529	100.4
3528	100.4
3527	100.39
3526	100.38
3525	100.36
3524	100.34
3523	100.33
3522	100.34
3521	100.35
3520	100.35
3519	100.35
3518	100.34
3517	100.33
3516	100.32
3515	100.33
3514	100.34
3513	100.35
3512	100.35
3511	100.35
3510	100.34
3509	100.32
3508	100.31
3507	100.3
3506	100.3
3505	100.3
3504	100.3
3503	100.29
3502	100.28
3501	100.27
3500	100.26
3499	100.26
3498	100.26
3497	100.25
3496	100.24
3495	100.24
3494	100.24
3493	100.24
3492	100.24
3491	100.24
3490	100.24
3489	100.24
3488	100.23
3487	100.23
3486	100.23
3485	100.23
3484	100.24
3483	100.23
3482	100.22
3481	100.22
3480	100.21
3479	100.21
3478	100.21
3477	100.2
3476	100.18
3475	100.17
3474	100.16
3473	100.16
3472	100.16
3471	100.17
3470	100.16
3469	100.15
3468	100.13
3467	100.11
3466	100.11
3465	100.11
3464	100.13
3463	100.14
3462	100.15
3461	100.15
3460	100.14
3459	100.13
3458	100.13
3457	100.13
3456	100.13
3455	100.13
3454	100.12
3453	100.11
3452	100.1
3451	100.1
3450	100.09
3449	100.09
3448	100.09
3447	100.1
3446	100.09
3445	100.08
3444	100.07
3443	100.07
3442	100.07
3441	100.08
3440	100.07
3439	100.06
3438	100.05
3437	100.04
3436	100.03
3435	100.03
3434	100.04
3433	100.04
3432	100.05
3431	100.04
3430	100.03
3429	100.02
3428	100.01
3427	100.01
3426	100.02
3425	100.02
3424	100.02
3423	100.02
3422	100.02
3421	100.02
3420	100.01
3419	100.01
3418	100.01
3417	100.01
3416	100.01
3415	100.01
3414	100.01
3413	100.01
3412	100.01
3411	100.01
3410	100.01
3409	100.01
3408	100.01
3407	99.99
3406	99.98
3405	99.97
3404	99.96
3403	99.96
3402	99.95
3401	99.94
3400	99.93
3399	99.93
3398	99.93
3397	99.94
3396	99.96
3395	99.96
3394	99.96
3393	99.96
3392	99.95
3391	99.95
3390	99.95
3389	99.96
3388	99.96
3387	99.95
3386	99.93
3385	99.92
3384	99.92
3383	99.92
3382	99.93
3381	99.93
3380	99.93
3379	99.93
3378	99.92
3377	99.91
3376	99.91
3375	99.91
3374	99.9
3373	99.9
3372	99.89
3371	99.88
3370	99.88
3369	99.89
3368	99.89
3367	99.9
3366	99.9
3365	99.9
3364	99.9
3363	99.89
3362	99.89
3361	99.89
3360	99.9
3359	99.9
3358	99.91
3357	99.92
3356	99.92
3355	99.91
3354	99.91
3353	99.91
3352	99.91
3351	99.91
3350	99.91
3349	99.91
3348	99.91
3347	99.91
3346	99.91
3345	99.92
3344	99.92
3343	99.91
3342	99.91
3341	99.91
3340	99.89
3339	99.88
3338	99.88
3337	99.87
3336	99.87
3335	99.86
3334	99.86
3333	99.86
3332	99.86
3331	99.87
3330	99.88
3329	99.88
3328	99.89
3327	99.89
3326	99.89
3325	99.88
3324	99.87
3323	99.86
3322	99.86
3321	99.87
3320	99.88
3319	99.89
3318	99.89
3317	99.89
3316	99.88
3315	99.88
3314	99.88
3313	99.88
3312	99.88
3311	99.89
3310	99.89
3309	99.89
3308	99.87
3307	99.86
3306	99.86
3305	99.86
3304	99.87
3303	99.87
3302	99.87
3301	99.88
3300	99.88
3299	99.88
3298	99.87
3297	99.87
3296	99.86
3295	99.86
3294	99.87
3293	99.88
3292	99.88
3291	99.89
3290	99.89
3289	99.9
3288	99.91
3287	99.91
3286	99.92
3285	99.92
3284	99.92
3283	99.91
3282	99.92
3281	99.92
3280	99.92
3279	99.92
3278	99.92
3277	99.93
3276	99.93
3275	99.94
3274	99.94
3273	99.93
3272	99.92
3271	99.92
3270	99.92
3269	99.93
3268	99.94
3267	99.95
3266	99.96
3265	99.97
3264	99.97
3263	99.97
3262	99.97
3261	99.98
3260	99.98
3259	99.98
3258	99.97
3257	99.97
3256	99.98
3255	99.99
3254	100
3253	100
3252	100
3251	100
3250	100
3249	100
3248	100.01
3247	100.01
3246	100.02
3245	100.02
3244	100.03
3243	100.03
3242	100.04
3241	100.04
3240	100.04
3239	100.04
3238	100.05
3237	100.06
3236	100.07
3235	100.07
3234	100.07
3233	100.06
3232	100.06
3231	100.06
3230	100.07
3229	100.08
3228	100.09
3227	100.1
3226	100.1
3225	100.1
3224	100.09
3223	100.09
3222	100.09
3221	100.09
3220	100.1
3219	100.11
3218	100.12
3217	100.13
3216	100.14
3215	100.15
3214	100.15
3213	100.15
3212	100.13
3211	100.12
3210	100.12
3209	100.12
3208	100.13
3207	100.14
3206	100.15
3205	100.17
3204	100.18
3203	100.2
3202	100.21
3201	100.21
3200	100.21
3199	100.2
3198	100.2
3197	100.19
3196	100.19
3195	100.19
3194	100.2
3193	100.21
3192	100.22
3191	100.23
3190	100.23
3189	100.23
3188	100.23
3187	100.23
3186	100.23
3185	100.24
3184	100.25
3183	100.26
3182	100.27
3181	100.27
3180	100.27
3179	100.28
3178	100.28
3177	100.29
3176	100.3
3175	100.31
3174	100.32
3173	100.33
3172	100.33
3171	100.32
3170	100.32
3169	100.33
3168	100.34
3167	100.35
3166	100.35
3165	100.35
3164	100.35
3163	100.36
3162	100.36
3161	100.37
3160	100.37
3159	100.37
3158	100.37
3157	100.37
3156	100.37
3155	100.37
3154	100.37
3153	100.37
3152	100.36
3151	100.36
3150	100.37
3149	100.38
3148	100.39
3147	100.4
3146	100.41
3145	100.42
3144	100.42
3143	100.43
3142	100.44
3141	100.44
3140	100.44
3139	100.44
3138	100.45
3137	100.45
3136	100.44
3135	100.44
3134	100.44
3133	100.44
3132	100.45
3131	100.47
3130	100.49
3129	100.5
3128	100.5
3127	100.5
3126	100.48
3125	100.48
3124	100.48
3123	100.49
3122	100.51
3121	100.52
3120	100.53
3119	100.54
3118	100.53
3117	100.52
3116	100.5
3115	100.49
3114	100.49
3113	100.5
3112	100.51
3111	100.53
3110	100.53
3109	100.53
3108	100.52
3107	100.52
3106	100.53
3105	100.53
3104	100.53
3103	100.53
3102	100.53
3101	100.55
3100	100.55
3099	100.56
3098	100.56
3097	100.56
3096	100.56
3095	100.56
3094	100.57
3093	100.57
3092	100.57
3091	100.58
3090	100.59
3089	100.59
3088	100.6
3087	100.59
3086	100.58
3085	100.56
3084	100.55
3083	100.55
3082	100.56
3081	100.58
3080	100.6
3079	100.61
3078	100.62
3077	100.63
3076	100.62
3075	100.62
3074	100.62
3073	100.61
3072	100.61
3071	100.61
3070	100.61
3069	100.61
3068	100.62
3067	100.62
3066	100.62
3065	100.62
3064	100.61
3063	100.61
3062	100.6
3061	100.61
3060	100.62
3059	100.63
3058	100.65
3057	100.66
3056	100.66
3055	100.66
3054	100.66
3053	100.66
3052	100.66
3051	100.66
3050	100.66
3049	100.67
3048	100.67
3047	100.68
3046	100.69
3045	100.7
3044	100.71
3043	100.71
3042	100.72
3041	100.72
3040	100.7
3039	100.68
3038	100.67
3037	100.67
3036	100.68
3035	100.69
3034	100.71
3033	100.71
3032	100.71
3031	100.7
3030	100.69
3029	100.69
3028	100.69
3027	100.69
3026	100.7
3025	100.71
3024	100.71
3023	100.7
3022	100.7
3021	100.69
3020	100.7
3019	100.7
3018	100.71
3017	100.72
3016	100.72
3015	100.72
3014	100.72
3013	100.71
3012	100.7
3011	100.69
3010	100.68
3009	100.67
3008	100.67
3007	100.66
3006	100.65
3005	100.64
3004	100.63
3003	100.62
3002	100.61
3001	100.6
3000	100.6
2999	100.6
2998	100.6
2997	100.6
2996	100.59
2995	100.58
2994	100.58
2993	100.59
2992	100.59
2991	100.58
2990	100.55
2989	100.53
2988	100.52
2987	100.52
2986	100.52
2985	100.52
2984	100.52
2983	100.52
2982	100.53
2981	100.55
2980	100.56
2979	100.56
2978	100.56
2977	100.54
2976	100.53
2975	100.53
2974	100.53
2973	100.53
2972	100.54
2971	100.54
2970	100.53
2969	100.51
2968	100.5
2967	100.49
2966	100.5
2965	100.51
2964	100.51
2963	100.51
2962	100.51
2961	100.5
2960	100.49
2959	100.49
2958	100.5
2957	100.51
2956	100.52
2955	100.53
2954	100.55
2953	100.56
2952	100.56
2951	100.56
2950	100.55
2949	100.55
2948	100.56
2947	100.58
2946	100.6
2945	100.61
2944	100.61
2943	100.58
2942	100.55
2941	100.52
2940	100.5
2939	100.49
2938	100.48
2937	100.48
2936	100.48
2935	100.47
2934	100.47
2933	100.46
2932	100.46
2931	100.47
2930	100.47
2929	100.47
2928	100.46
2927	100.44
2926	100.42
2925	100.41
2924	100.4
2923	100.39
2922	100.4
2921	100.42
2920	100.44
2919	100.48
2918	100.51
2917	100.54
2916	100.56
2915	100.59
2914	100.62
2913	100.63
2912	100.64
2911	100.64
2910	100.65
2909	100.65
2908	100.66
2907	100.67
2906	100.68
2905	100.69
2904	100.7
2903	100.7
2902	100.71
2901	100.72
2900	100.73
2899	100.74
2898	100.76
2897	100.78
2896	100.79
2895	100.79
2894	100.79
2893	100.79
2892	100.78
2891	100.78
2890	100.79
2889	100.81
2888	100.82
2887	100.84
2886	100.84
2885	100.85
2884	100.85
2883	100.85
2882	100.85
2881	100.85
2880	100.85
2879	100.86
2878	100.87
2877	100.89
2876	100.91
2875	100.93
2874	100.95
2873	100.96
2872	100.96
2871	100.95
2870	100.94
2869	100.93
2868	100.92
2867	100.92
2866	100.93
2865	100.93
2864	100.93
2863	100.93
2862	100.94
2861	100.95
2860	100.95
2859	100.96
2858	100.96
2857	100.96
2856	100.96
2855	100.96
2854	100.96
2853	100.95
2852	100.95
2851	100.95
2850	100.97
2849	101
2848	101.03
2847	101.05
2846	101.06
2845	101.06
2844	101.07
2843	101.08
2842	101.1
2841	101.13
2840	101.16
2839	101.18
2838	101.19
2837	101.2
2836	101.2
2835	101.2
2834	101.2
2833	101.21
2832	101.21
2831	101.22
2830	101.22
2829	101.22
2828	101.22
2827	101.21
2826	101.22
2825	101.22
2824	101.22
2823	101.23
2822	101.23
2821	101.23
2820	101.24
2819	101.25
2818	101.26
2817	101.27
2816	101.28
2815	101.28
2814	101.29
2813	101.29
2812	101.3
2811	101.31
2810	101.32
2809	101.32
2808	101.32
2807	101.32
2806	101.32
2805	101.32
2804	101.33
2803	101.34
2802	101.35
2801	101.34
2800	101.34
2799	101.33
2798	101.34
2797	101.35
2796	101.37
2795	101.38
2794	101.39
2793	101.39
2792	101.39
2791	101.39
2790	101.38
2789	101.38
2788	101.37
2787	101.37
2786	101.37
2785	101.37
2784	101.37
2783	101.38
2782	101.4
2781	101.41
2780	101.42
2779	101.42
2778	101.42
2777	101.42
2776	101.43
2775	101.43
2774	101.43
2773	101.43
2772	101.43
2771	101.43
2770	101.44
2769	101.44
2768	101.44
2767	101.44
2766	101.44
2765	101.44
2764	101.45
2763	101.45
2762	101.46
2761	101.47
2760	101.47
2759	101.47
2758	101.47
2757	101.47
2756	101.47
2755	101.47
2754	101.46
2753	101.46
2752	101.47
2751	101.47
2750	101.48
2749	101.49
2748	101.49
2747	101.49
2746	101.5
2745	101.5
2744	101.5
2743	101.5
2742	101.5
2741	101.51
2740	101.51
2739	101.52
2738	101.52
2737	101.52
2736	101.52
2735	101.52
2734	101.51
2733	101.52
2732	101.52
2731	101.52
2730	101.52
2729	101.52
2728	101.52
2727	101.53
2726	101.54
2725	101.54
2724	101.55
2723	101.56
2722	101.57
2721	101.57
2720	101.56
2719	101.56
2718	101.56
2717	101.56
2716	101.57
2715	101.57
2714	101.58
2713	101.58
2712	101.58
2711	101.58
2710	101.57
2709	101.56
2708	101.56
2707	101.56
2706	101.56
2705	101.57
2704	101.58
2703	101.58
2702	101.58
2701	101.58
2700	101.58
2699	101.59
2698	101.6
2697	101.61
2696	101.61
2695	101.61
2694	101.61
2693	101.61
2692	101.6
2691	101.59
2690	101.59
2689	101.59
2688	101.59
2687	101.59
2686	101.6
2685	101.6
2684	101.61
2683	101.62
2682	101.62
2681	101.62
2680	101.63
2679	101.63
2678	101.63
2677	101.62
2676	101.62
2675	101.61
2674	101.62
2673	101.62
2672	101.62
2671	101.61
2670	101.61
2669	101.62
2668	101.62
2667	101.62
2666	101.62
2665	101.61
2664	101.59
2663	101.58
2662	101.57
2661	101.56
2660	101.54
2659	101.53
2658	101.52
2657	101.51
2656	101.5
2655	101.5
2654	101.5
2653	101.49
2652	101.48
2651	101.47
2650	101.46
2649	101.45
2648	101.45
2647	101.45
2646	101.44
2645	101.44
2644	101.44
2643	101.44
2642	101.43
2641	101.43
2640	101.42
2639	101.42
2638	101.41
2637	101.41
2636	101.41
2635	101.4
2634	101.39
2633	101.38
2632	101.38
2631	101.38
2630	101.39
2629	101.38
2628	101.37
2627	101.36
2626	101.37
2625	101.37
2624	101.36
2623	101.36
2622	101.36
2621	101.36
2620	101.36
2619	101.37
2618	101.38
2617	101.38
2616	101.39
2615	101.4
2614	101.39
2613	101.37
2612	101.36
2611	101.36
2610	101.38
2609	101.39
2608	101.4
2607	101.41
2606	101.41
2605	101.41
2604	101.41
2603	101.4
2602	101.39
2601	101.39
2600	101.38
2599	101.39
2598	101.39
2597	101.4
2596	101.4
2595	101.4
2594	101.41
2593	101.4
2592	101.39
2591	101.39
2590	101.39
2589	101.39
2588	101.39
2587	101.39
2586	101.38
2585	101.38
2584	101.38
2583	101.39
2582	101.4
2581	101.4
2580	101.39
2579	101.38
2578	101.37
2577	101.36
2576	101.36
2575	101.36
2574	101.36
2573	101.37
2572	101.37
2571	101.36
2570	101.35
2569	101.33
2568	101.32
2567	101.32
2566	101.32
2565	101.31
2564	101.3
2563	101.28
2562	101.27
2561	101.26
2560	101.25
2559	101.25
2558	101.24
2557	101.23
2556	101.22
2555	101.2
2554	101.19
2553	101.17
2552	101.17
2551	101.16
2550	101.16
2549	101.14
2548	101.13
2547	101.11
2546	101.11
2545	101.13
2544	101.15
2543	101.17
2542	101.18
2541	101.18
2540	101.17
2539	101.16
2538	101.14
2537	101.13
2536	101.12
2535	101.11
2534	101.1
2533	101.08
2532	101.05
2531	101.02
2530	100.99
2529	100.96
2528	100.93
2527	100.91
2526	100.9
2525	100.89
2524	100.88
2523	100.87
2522	100.87
2521	100.88
2520	100.88
2519	100.89
2518	100.89
2517	100.91
2516	100.93
2515	100.98
2514	101.02
2513	101.05
2512	101.07
2511	101.08
2510	101.08
2509	101.08
2508	101.07
2507	101.08
2506	101.09
2505	101.1
2504	101.1
2503	101.08
2502	101.06
2501	101.04
2500	101.04
2499	101.04
2498	101.06
2497	101.07
2496	101.1
2495	101.12
2494	101.15
2493	101.16
2492	101.16
2491	101.16
2490	101.17
2489	101.2
2488	101.24
2487	101.28
2486	101.31
2485	101.33
2484	101.35
2483	101.37
2482	101.39
2481	101.41
2480	101.43
2479	101.45
2478	101.48
2477	101.49
2476	101.51
2475	101.53
2474	101.55
2473	101.56
2472	101.56
2471	101.58
2470	101.6
2469	101.62
2468	101.63
2467	101.64
2466	101.63
2465	101.63
2464	101.63
2463	101.64
2462	101.67
2461	101.69
2460	101.69
2459	101.68
2458	101.68
2457	101.69
2456	101.7
2455	101.71
2454	101.71
2453	101.7
2452	101.7
2451	101.7
2450	101.71
2449	101.74
2448	101.76
2447	101.78
2446	101.78
2445	101.77
2444	101.76
2443	101.75
2442	101.77
2441	101.78
2440	101.8
2439	101.81
2438	101.81
2437	101.81
2436	101.8
2435	101.8
2434	101.81
2433	101.81
2432	101.82
2431	101.83
2430	101.85
2429	101.87
2428	101.88
2427	101.87
2426	101.88
2425	101.88
2424	101.88
2423	101.88
2422	101.87
2421	101.86
2420	101.86
2419	101.88
2418	101.9
2417	101.9
2416	101.9
2415	101.9
2414	101.91
2413	101.93
2412	101.93
2411	101.94
2410	101.94
2409	101.93
2408	101.93
2407	101.93
2406	101.93
2405	101.94
2404	101.94
2403	101.96
2402	101.97
2401	101.98
2400	101.98
2399	101.98
2398	101.99
2397	102
2396	101.99
2395	101.99
2394	102
2393	102.01
2392	102.02
2391	102.03
2390	102.04
2389	102.04
2388	102.05
2387	102.06
2386	102.08
2385	102.1
2384	102.12
2383	102.15
2382	102.17
2381	102.19
2380	102.22
2379	102.25
2378	102.29
2377	102.32
2376	102.33
2375	102.34
2374	102.36
2373	102.39
2372	102.4
2371	102.42
2370	102.43
2369	102.43
2368	102.41
2367	102.4
2366	102.4
2365	102.41
2364	102.42
2363	102.43
2362	102.43
2361	102.43
2360	102.42
2359	102.43
2358	102.45
2357	102.45
2356	102.43
2355	102.42
2354	102.42
2353	102.44
2352	102.46
2351	102.48
2350	102.5
2349	102.49
2348	102.46
2347	102.45
2346	102.45
2345	102.44
2344	102.42
2343	102.4
2342	102.39
2341	102.39
2340	102.38
2339	102.38
2338	102.37
2337	102.37
2336	102.36
2335	102.35
2334	102.34
2333	102.33
2332	102.34
2331	102.36
2330	102.38
2329	102.36
2328	102.31
2327	102.24
2326	102.15
2325	102.07
2324	102.03
2323	102.03
2322	102.05
2321	102.07
2320	102.08
2319	102.1
2318	102.13
2317	102.15
2316	102.16
2315	102.16
2314	102.15
2313	102.14
2312	102.12
2311	102.11
2310	102.11
2309	102.09
2308	102.09
2307	102.09
2306	102.09
2305	102.07
2304	102.05
2303	102.03
2302	102.02
2301	102
2300	101.97
2299	101.95
2298	101.92
2297	101.91
2296	101.91
2295	101.92
2294	101.92
2293	101.91
2292	101.88
2291	101.85
2290	101.82
2289	101.79
2288	101.75
2287	101.74
2286	101.73
2285	101.72
2284	101.72
2283	101.73
2282	101.76
2281	101.79
2280	101.81
2279	101.82
2278	101.81
2277	101.8
2276	101.79
2275	101.8
2274	101.81
2273	101.8
2272	101.79
2271	101.79
2270	101.79
2269	101.78
2268	101.77
2267	101.77
2266	101.79
2265	101.79
2264	101.78
2263	101.77
2262	101.76
2261	101.75
2260	101.74
2259	101.75
2258	101.77
2257	101.78
2256	101.79
2255	101.81
2254	101.83
2253	101.84
2252	101.82
2251	101.8
2250	101.79
2249	101.79
2248	101.79
2247	101.79
2246	101.8
2245	101.79
2244	101.76
2243	101.75
2242	101.74
2241	101.73
2240	101.73
2239	101.75
2238	101.77
2237	101.76
2236	101.74
2235	101.71
2234	101.7
2233	101.7
2232	101.69
2231	101.67
2230	101.67
2229	101.68
2228	101.69
2227	101.69
2226	101.69
2225	101.67
2224	101.66
2223	101.65
2222	101.64
2221	101.62
2220	101.6
2219	101.6
2218	101.62
2217	101.61
2216	101.6
2215	101.59
2214	101.59
2213	101.59
2212	101.59
2211	101.6
2210	101.62
2209	101.63
2208	101.63
2207	101.63
2206	101.63
2205	101.61
2204	101.57
2203	101.55
2202	101.54
2201	101.52
2200	101.5
2199	101.48
2198	101.47
2197	101.48
2196	101.51
2195	101.56
2194	101.6
2193	101.59
2192	101.55
2191	101.5
2190	101.47
2189	101.44
2188	101.4
2187	101.38
2186	101.39
2185	101.42
2184	101.45
2183	101.49
2182	101.53
2181	101.54
2180	101.5
2179	101.45
2178	101.4
2177	101.39
2176	101.41
2175	101.46
2174	101.5
2173	101.48
2172	101.43
2171	101.37
2170	101.33
2169	101.29
2168	101.23
2167	101.18
2166	101.15
2165	101.13
2164	101.1
2163	101.06
2162	101.03
2161	101.04
2160	101.14
2159	101.36
2158	101.58
2157	101.72
2156	101.74
2155	101.73
2154	101.73
2153	101.74
2152	101.75
2151	101.78
2150	101.82
2149	101.83
2148	101.85
2147	101.88
2146	101.92
2145	101.95
2144	101.96
2143	101.96
2142	101.97
2141	101.96
2140	101.94
2139	101.94
2138	101.97
2137	102
2136	102.02
2135	102.05
2134	102.09
2133	102.13
2132	102.17
2131	102.2
2130	102.21
2129	102.21
2128	102.19
2127	102.17
2126	102.15
2125	102.12
2124	102.1
2123	102.1
2122	102.11
2121	102.12
2120	102.12
2119	102.12
2118	102.09
2117	102.05
2116	102
2115	101.99
2114	102
2113	101.99
2112	101.95
2111	101.94
2110	101.95
2109	101.99
2108	102.02
2107	102.04
2106	102.03
2105	102.01
2104	101.98
2103	101.98
2102	101.98
2101	101.98
2100	101.98
2099	101.99
2098	102.02
2097	102.03
2096	102.04
2095	102.05
2094	102.07
2093	102.09
2092	102.12
2091	102.13
2090	102.13
2089	102.09
2088	102.04
2087	102.01
2086	101.99
2085	101.99
2084	101.98
2083	101.97
2082	101.96
2081	101.94
2080	101.93
2079	101.94
2078	101.96
2077	101.96
2076	101.95
2075	101.94
2074	101.93
2073	101.92
2072	101.9
2071	101.91
2070	101.92
2069	101.93
2068	101.94
2067	101.95
2066	101.95
2065	101.94
2064	101.92
2063	101.92
2062	101.92
2061	101.9
2060	101.88
2059	101.85
2058	101.83
2057	101.8
2056	101.78
2055	101.78
2054	101.78
2053	101.74
2052	101.67
2051	101.62
2050	101.61
2049	101.61
2048	101.61
2047	101.6
2046	101.6
2045	101.59
2044	101.58
2043	101.57
2042	101.58
2041	101.58
2040	101.58
2039	101.58
2038	101.59
2037	101.58
2036	101.55
2035	101.54
2034	101.55
2033	101.56
2032	101.58
2031	101.63
2030	101.66
2029	101.64
2028	101.59
2027	101.57
2026	101.57
2025	101.57
2024	101.57
2023	101.58
2022	101.61
2021	101.62
2020	101.63
2019	101.66
2018	101.71
2017	101.74
2016	101.76
2015	101.77
2014	101.78
2013	101.77
2012	101.77
2011	101.79
2010	101.84
2009	101.86
2008	101.86
2007	101.89
2006	101.93
2005	101.94
2004	101.91
2003	101.86
2002	101.83
[truncated: 1,602 more rows]

## Sheet: RAMAN
X	Y		GraphName = pc-488nm
-248.404	911.107		SizeX = 1
-244.747	911.389		SizeY = 1
-241.092	910.805		SizeGraph = 1600
-237.439	911.309		DataUnit = CCD cts
-233.786	911.275
-230.136	911.096
-226.486	911.207
-222.838	910.777
-219.191	911.383
-215.545	910.85
-211.901	911.256
-208.258	911.514
-204.617	911.029
-200.977	910.977
-197.338	910.756
-193.7	911.146
-190.064	911.592
-186.429	910.932
-182.795	911.482
-179.163	911.209
-175.532	911.453
-171.903	911.287
-168.275	910.871
-164.648	911.129
-161.022	911.139
-157.398	911.314
-153.775	911.422
-150.153	910.586
-146.533	911.273
-142.914	911.547
-139.297	911.186
-135.68	911.154
-132.065	910.35
-128.452	911.586
-124.839	911.303
-121.228	911.371
-117.619	911.432
-114.01	911.17
-110.403	911.17
-106.798	911.236
-103.193	910.98
-99.5901	911.697
-95.9883	911.305
-92.3879	911.52
-88.7887	911.137
-85.1909	911.225
-81.5944	911.684
-77.9991	911.336
-74.4052	911.584
-70.8126	911.193
-67.2214	911.482
-63.6314	911.686
-60.0427	911.676
-56.4554	911.764
-52.8693	912.236
-49.2846	912.309
-45.7011	912.656
-42.119	911.006
-38.5382	912.588
-34.9586	913.309
-31.3804	912.807
-27.8035	914.387
-24.2279	915.242
-20.6536	923.227
-17.0805	960.967
-13.5088	1165.64
-9.93841	1895.15
-6.36929	3269.05
-2.80147	4082.91
0.765057	3592.03
4.33029	2324.4
7.89422	1309.88
11.4569	957.381
15.0182	919.629
18.5783	914.111
22.137	913.297
25.6945	912.971
29.2507	911.801
32.8055	912.52
36.3591	911.682
39.9114	912.113
43.4625	912.262
47.0122	911.279
50.5606	911.57
54.1078	912.102
57.6536	913.389
61.1982	919.217
64.7415	934.467
68.2835	961.303
71.8243	985.955
75.3637	1003.67
78.9019	1018.51
82.4388	1029.6
85.9744	1038.11
89.5087	1039.38
93.0417	1040.29
96.5735	1044.41
100.104	1048.6
103.633	1051.42
107.161	1051.9
110.688	1054.42
114.213	1057.49
117.737	1060.77
121.26	1061.61
124.782	1062.17
128.302	1066.05
131.821	1070.47
135.339	1078.69
138.855	1097.96
142.37	1121.59
145.884	1136.04
149.397	1147.64
152.908	1156.15
156.418	1149.59
159.927	1130.57
163.435	1108.56
166.941	1091.55
170.446	1081.97
173.95	1082.54
177.453	1087.93
180.954	1094.84
184.454	1103.52
187.953	1111.16
191.45	1115.43
194.946	1113.82
198.441	1112.24
201.935	1129.76
205.427	1153.07
208.919	1159.13
212.408	1147.03
215.897	1130.27
219.385	1116.11
222.871	1101.34
226.356	1089.35
229.839	1080.8
233.322	1075.93
236.803	1074.24
240.283	1075.17
243.761	1078.58
247.239	1081.29
250.715	1082.6
254.19	1083.38
257.663	1081.79
261.136	1083.13
264.607	1088.01
268.077	1094.75
271.546	1102.83
275.013	1104.1
278.479	1104.81
281.944	1099.8
285.408	1097.83
288.87	1094.99
292.331	1090.63
295.791	1088.1
299.25	1088.52
302.707	1088.57
306.164	1088.11
309.619	1084.68
313.072	1084.2
316.525	1085.06
319.976	1084.94
323.426	1084.96
326.875	1084.46
330.322	1087.39
333.769	1086.23
337.214	1086.89
340.658	1087.45
344.1	1087.51
347.542	1088.15
350.982	1089.02
354.421	1090.28
357.859	1090.76
361.295	1090.79
364.73	1093.95
368.164	1094.6
371.597	1093.45
375.029	1094.73
378.459	1095.14
381.888	1096.92
385.316	1096.23
388.743	1098.26
392.168	1100.92
395.592	1100.62
399.015	1101.18
402.437	1101.12
405.857	1100.01
409.277	1100.99
412.695	1102.06
416.112	1103.38
419.527	1103.05
422.942	1100.91
426.355	1101.21
429.767	1102.12
433.178	1103.21
436.587	1106.53
439.996	1109.48
443.403	1111.41
446.809	1109.68
450.214	1108.51
453.617	1107.99
457.019	1107.93
460.42	1108.71
463.82	1108.61
467.219	1111.42
470.616	1114.41
474.013	1116.75
477.408	1116.71
480.801	1115.53
484.194	1114.08
487.585	1114.09
490.976	1113.69
494.365	1114.7
497.752	1116.67
501.139	1118.49
504.524	1119.23
507.908	1120.19
511.291	1120.56
514.673	1119.59
518.054	1122.93
521.433	1125.29
524.811	1124.05
528.188	1124.1
531.564	1123.07
534.939	1121.35
538.312	1122.84
541.684	1128.57
545.055	1131.3
548.425	1129.33
551.793	1127.41
555.161	1126.21
558.527	1130.27
561.892	1130.55
565.256	1129.62
568.618	1130.49
571.98	1130.92
575.34	1130.57
578.699	1130.79
582.057	1133.73
585.414	1139.12
588.769	1141.45
592.123	1139.22
595.477	1136.65
598.828	1136.4
602.179	1139.94
605.529	1145.44
608.877	1142.88
612.224	1139.46
615.57	1138.29
618.915	1138.58
622.259	1138
625.601	1133.64
628.942	1132.99
632.282	1134.9
635.621	1141.43
638.959	1146.46
642.296	1145.91
645.631	1145.21
648.965	1142.64
652.298	1142.83
655.63	1145.28
658.96	1149.49
662.29	1152.76
665.618	1151.19
668.945	1148.32
672.271	1148.26
675.596	1152.68
678.92	1157.71
682.242	1155.8
685.563	1156.3
688.883	1155.65
692.202	1160.66
695.52	1173.66
698.837	1207.08
702.152	1259.31
705.466	1290.22
708.779	1274.12
712.091	1226.59
715.402	1188.24
718.712	1171.73
722.02	1167.4
725.327	1166.03
728.633	1167.21
731.938	1163.19
735.242	1160.4
738.545	1157.68
741.846	1160.2
745.146	1160.28
748.445	1158.97
751.743	1160.16
755.04	1163.42
758.336	1167.77
761.63	1171.07
764.924	1169.29
768.216	1169.04
771.507	1167.51
774.797	1170.63
778.085	1174.47
781.373	1174.28
784.659	1177.05
787.944	1179.51
791.228	1176.6
794.511	1174.81
797.793	1169.97
801.074	1173.16
804.353	1177.67
807.632	1179.43
810.909	1180.13
814.185	1178.57
817.46	1176.88
820.733	1175.98
824.006	1179.2
827.277	1183.66
830.548	1186.97
833.817	1184.9
837.085	1185.71
840.352	1187.2
843.617	1186.24
846.882	1183.78
850.145	1183.43
853.408	1181.07
856.669	1185.61
859.929	1187.46
863.188	1189.26
866.445	1191.24
869.702	1191.39
872.957	1188.34
876.212	1189.03
879.465	1187.84
882.717	1190
885.968	1193.34
889.217	1200.41
892.466	1201.43
895.713	1198.22
898.96	1197.14
902.205	1199.33
905.449	1200.51
908.692	1198.32
911.934	1199.07
915.175	1204.03
918.414	1200.98
921.653	1198.87
924.89	1198.4
928.126	1197.17
931.361	1197.43
934.595	1201.06
937.828	1207.88
941.059	1206.58
944.29	1203.65
947.519	1204
950.748	1207.79
953.975	1208.31
957.201	1207.06
960.426	1211.27
963.649	1214.81
966.872	1213.68
970.094	1209.53
973.314	1210.05
976.533	1212.68
979.752	1216.34
982.969	1214.53
986.185	1212.89
989.399	1211.98
992.613	1210.49
995.826	1214.33
999.037	1217.41
1002.25	1219.19
1005.46	1221.76
1008.66	1225.01
1011.87	1223.47
1015.08	1220.49
1018.28	1219.17
1021.49	1219.76
1024.69	1220.9
1027.89	1221.93
1031.09	1221.8
1034.29	1226.79
1037.49	1227.17
1040.68	1227.7
1043.88	1229.92
1047.08	1230.1
1050.27	1231.7
1053.46	1233.96
1056.65	1236.85
1059.84	1235.85
1063.03	1235.46
1066.22	1238.93
1069.41	1248.52
1072.59	1252.36
1075.78	1271.61
1078.96	1348.1
1082.14	1630.68
1085.33	2050.17
1088.51	2174.65
1091.69	1838.49
1094.86	1452.74
1098.04	1282.38
1101.22	1251.14
1104.39	1244.88
1107.57	1240.51
1110.74	1238.26
1113.91	1237.74
1117.08	1240.14
1120.25	1239
1123.42	1241.94
1126.59	1244.5
1129.75	1247.84
1132.92	1246.39
1136.08	1243.27
1139.24	1244.46
1142.41	1244.37
1145.57	1243.9
1148.73	1248.91
1151.88	1257.19
1155.04	1256.57
1158.2	1252.66
1161.35	1250.77
1164.51	1251.81
1167.66	1255.89
1170.81	1259.47
1173.96	1258.37
1177.11	1255.15
1180.26	1254.14
1183.41	1256.29
1186.56	1261.74
1189.7	1264.54
1192.85	1264.71
1195.99	1259.35
1199.13	1257.29
1202.27	1258.29
1205.41	1265.72
1208.55	1270.75
1211.69	1270.91
1214.83	1269.8
1217.96	1270.19
1221.1	1269.96
1224.23	1267.03
1227.36	1259.77
1230.49	1258
1233.62	1261.15
1236.75	1269.83
1239.88	1275.23
1243.01	1271.07
1246.14	1265.63
1249.26	1271.99
1252.38	1276.87
1255.51	1280.11
1258.63	1281.24
1261.75	1281.36
1264.87	1281.11
1267.99	1276.33
1271.1	1279
1274.22	1280.08
1277.34	1278.13
1280.45	1282.05
1283.56	1282.5
1286.68	1278.2
1289.79	1276
1292.9	1277.71
1296.01	1284.5
1299.11	1292.11
1302.22	1296.53
1305.33	1294.81
1308.43	1294.61
1311.53	1292.52
1314.64	1286.19
1317.74	1287.41
1320.84	1289.41
1323.94	1294.37
1327.04	1299.7
1330.13	1300.52
1333.23	1294.85
1336.32	1292.54
1339.42	1295.52
1342.51	1299.91
1345.6	1302.65
1348.69	1301.11
1351.78	1302.02
1354.87	1300.01
1357.96	1300.36
1361.05	1303.88
1364.13	1302.83
1367.22	1304.71
1370.3	1307.51
1373.38	1306.42
1376.46	1303.53
1379.54	1300.52
1382.62	1300.73
1385.7	1300.75
1388.78	1303.36
1391.86	1304.55
1394.93	1306.45
1398	1309.81
1401.08	1312.97
1404.15	1313.73
1407.22	1309.26
1410.29	1310.74
1413.36	1315.8
1416.43	1319.38
1419.49	1326.45
1422.56	1329.54
1425.62	1319.38
1428.69	1313.47
1431.75	1313.89
1434.81	1317.2
1437.87	1321.25
1440.93	1323.09
1443.99	1323.21
1447.05	1318.69
1450.1	1320.36
1453.16	1326.59
1456.21	1325.88
1459.26	1323.53
1462.32	1324.73
1465.37	1325.79
1468.42	1327.93
1471.47	1330.15
1474.51	1329.35
1477.56	1330.27
1480.61	1327.27
1483.65	1322.59
1486.7	1326.08
1489.74	1329.53
1492.78	1331.8
1495.82	1336.39
1498.86	1336.79
1501.9	1337.33
1504.94	1336.38
1507.97	1336.77
1511.01	1332.33
1514.04	1332.92
1517.08	1336.07
1520.11	1338.04
1523.14	1335.86
1526.17	1338.98
1529.2	1346.33
1532.23	1349.53
1535.26	1346.49
1538.28	1341.69
1541.31	1348.15
1544.33	1354.83
1547.35	1351.9
1550.38	1346.82
1553.4	1345.69
1556.42	1348.12
1559.44	1347.3
1562.46	1348.42
1565.47	1353.72
1568.49	1358.15
1571.5	1353.14
1574.52	1349.71
1577.53	1354.13
1580.54	1357.59
1583.55	1359.37
1586.56	1359.04
1589.57	1353.48
1592.58	1348.69
1595.59	1349.23
1598.59	1352.78
1601.6	1352.55
1604.6	1349.25
1607.6	1351.52
1610.61	1357.22
1613.61	1364.83
1616.61	1365.03
1619.6	1360.36
1622.6	1361.77
1625.6	1362.05
1628.59	1362.89
1631.59	1365.18
1634.58	1369.44
1637.58	1373.42
1640.57	1374.28
1643.56	1374.17
1646.55	1374
1649.54	1373.43
1652.52	1371.43
1655.51	1371.78
1658.5	1378.61
1661.48	1382.88
1664.46	1378.68
1667.45	1377.03
1670.43	1380.4
1673.41	1380.02
1676.39	1378.66
1679.37	1374.26
1682.34	1373.77
1685.32	1372.71
1688.3	1370.99
1691.27	1372.78
1694.24	1378.42
1697.22	1380.96
1700.19	1379.57
1703.16	1378.76
1706.13	1384.88
1709.1	1388.86
1712.06	1387.64
1715.03	1386.2
1718	1385.45
1720.96	1389.43
1723.93	1393.97
1726.89	1386.08
1729.85	1383.45
1732.81	1384.09
1735.77	1384.68
1738.73	1385.51
1741.69	1389.69
1744.64	1387.19
1747.6	1391.36
1750.55	1395.51
1753.51	1393.56
1756.46	1394.11
1759.41	1391.8
1762.36	1392.93
1765.31	1397.82
1768.26	1397.89
1771.21	1400.47
1774.15	1399.24
1777.1	1402.34
1780.04	1404.14
1782.99	1403.53
1785.93	1397.48
1788.87	1395.8
1791.81	1394.56
1794.75	1392.99
1797.69	1393.69
1800.63	1399.63
1803.57	1408.52
1806.5	1418.24
1809.44	1419.76
1812.37	1414.3
1815.3	1405.32
1818.24	1396.96
1821.17	1396.31
1824.1	1397.2
1827.03	1396.98
1829.95	1403.3
1832.88	1409.66
1835.81	1410.84
1838.73	1412.14
1841.66	1407.42
1844.58	1407.63
1847.5	1412.21
1850.42	1410.02
1853.34	1404.83
1856.26	1401.39
1859.18	1410.15
1862.1	1417.88
1865.01	1416.92
1867.93	1414.6
1870.84	1416.96
1873.76	1416.01
1876.67	1416.54
1879.58	1413.12
1882.49	1417.66
1885.4	1427.41
1888.31	1424.75
1891.22	1425.76
1894.12	1424.34
1897.03	1428.11
1899.93	1428.77
1902.84	1428.75
1905.74	1435.59
1908.64	1433.82
1911.54	1424.22
1914.44	1416.81
1917.34	1414.36
1920.24	1419.02
1923.13	1426.5
1926.03	1424.87
1928.93	1430.85
1931.82	1435.61
1934.71	1439.28
1937.6	1440.8
1940.5	1431.77
1943.39	1422.5
1946.28	1420.29
1949.16	1434.44
1952.05	1442.36
1954.94	1443.57
1957.82	1442.05
1960.71	1437.72
1963.59	1435.56
1966.47	1442.15
1969.35	1442.62
1972.23	1439.93
1975.11	1436.93
1977.99	1431.14
1980.87	1425.56
1983.75	1427.84
1986.62	1429.52
1989.5	1434.85
1992.37	1438.84
1995.24	1441.65
1998.12	1438.31
2000.99	1438.5
2003.86	1444.47
2006.73	1453.79
2009.59	1453.42
2012.46	1449
2015.33	1445.05
2018.19	1443.99
2021.06	1445.94
2023.92	1451.74
2026.78	1449.66
2029.65	1445.47
2032.51	1450.42
2035.37	1451.24
2038.22	1448.97
2041.08	1448.25
2043.94	1440.3
2046.79	1446.3
2049.65	1453.92
2052.5	1452.48
2055.36	1453.98
2058.21	1457.27
2061.06	1459.01
2063.91	1461.88
2066.76	1464.49
2069.61	1461.02
2072.45	1454.57
2075.3	1450.26
2078.15	1448.31
2080.99	1450.1
2083.83	1458.84
2086.68	1458.7
2089.52	1451.38
2092.36	1449.03
2095.2	1458.23
2098.04	1464.4
2100.88	1465.58
2103.71	1463.5
2106.55	1462.49
2109.38	1462.01
2112.22	1462.87
2115.05	1462.05
2117.88	1460.06
2120.72	1455.63
2123.55	1463.76
2126.38	1469.45
2129.2	1474.96
2132.03	1471.7
2134.86	1472.77
2137.68	1469.65
2140.51	1465.76
2143.33	1459.99
2146.16	1463.7
2148.98	1467.92
2151.8	1465.24
2154.62	1469.67
2157.44	1476.28
2160.26	1481.23
2163.07	1473.86
2165.89	1462.3
2168.71	1465.08
2171.52	1472.4
2174.33	1477.68
2177.15	1482.49
2179.96	1483.42
2182.77	1484.71
2185.58	1483.19
2188.39	1478.04
2191.2	1473.86
2194	1469.11
2196.81	1467.86
2199.62	1473.74
2202.42	1473.05
2205.22	1469.64
2208.03	1474.1
2210.83	1479.58
2213.63	1479.59
2216.43	1473
2219.23	1471.25
2222.03	1470.83
2224.82	1480.39
2227.62	1486.98
2230.41	1484.66
2233.21	1481.01
2236	1477
2238.8	1474.82
2241.59	1474.55
2244.38	1473.71
2247.17	1482.77
2249.96	1486.85
2252.74	1484.54
2255.53	1477.24
2258.32	1479.3
2261.1	1482.09
2263.89	1482.39
2266.67	1483.19
2269.45	1478.44
2272.23	1478.26
2275.02	1490.44
2277.79	1496.48
2280.57	1498.19
2283.35	1495.6
2286.13	1491.95
2288.9	1496.33
2291.68	1500.75
2294.45	1491.06
2297.23	1485.08
2300	1486.42
2302.77	1494.26
2305.54	1499.29
2308.31	1496.89
2311.08	1492.1
2313.85	1490.38
2316.62	1494.96
2319.38	1492.78
2322.15	1489.31
2324.91	1487.88
2327.68	1495.61
2330.44	1499.93
2333.2	1499.02
2335.96	1493.9
2338.72	1497.03
2341.48	1494.35
2344.24	1495.09
2346.99	1497.31
2349.75	1503.41
2352.51	1505.83
2355.26	1505.34
2358.01	1498.04
2360.77	1495.46
2363.52	1494.17
2366.27	1497.25
2369.02	1500.79
2371.77	1502.78
2374.52	1500.96
2377.26	1495.54
2380.01	1495.2
2382.75	1496.76
2385.5	1499.21
2388.24	1498.23
2390.99	1501.94
2393.73	1507.03
2396.47	1507.9
2399.21	1501.73
2401.95	1492.2
2404.69	1497.99
2407.42	1508.71
2410.16	1503.43
2412.9	1501.52
2415.63	1507.18
2418.36	1514.8
2421.1	1509.95
2423.83	1504.53
2426.56	1505.57
2429.29	1512.2
2432.02	1519.63
2434.75	1516.88
2437.48	1511.03
2440.2	1500.37
2442.93	1498.47
2445.65	1511
2448.38	1516.56
2451.1	1516.65
2453.82	1513.7
2456.55	1518.02
2459.27	1528.67
2461.99	1524.76
2464.7	1515.36
2467.42	1508.71
2470.14	1500.9
2472.86	1506.74
2475.57	1507.08
2478.29	1513.41
2481	1518.25
2483.71	1517.37
2486.42	1519.36
2489.13	1523.57
2491.84	1519.22
2494.55	1519.71
2497.26	1522.71
2499.97	1524.87
2502.68	1525.46
2505.38	1518.05
2508.09	1513.75
2510.79	1513.72
2513.49	1510.43
2516.2	1507.67
2518.9	1511.04
2521.6	1512.81
2524.3	1514.19
2527	1522.34
2529.69	1522.2
2532.39	1516.24
2535.09	1516.71
2537.78	1522.23
2540.48	1525.85
2543.17	1524.86
2545.86	1524.75
2548.55	1524.99
2551.24	1523.43
2553.93	1527.36
2556.62	1526.32
2559.31	1524.15
2562	1521.53
2564.68	1520.34
2567.37	1530.15
2570.05	1534.46
2572.74	1536.33
2575.42	1535.69
2578.1	1531.46
2580.79	1523.75
2583.47	1514.41
2586.15	1516.33
2588.82	1523.13
2591.5	1531.15
2594.18	1539.6
2596.85	1531.35
2599.53	1529.83
2602.2	1533.21
2604.88	1535.99
2607.55	1532.99
2610.22	1528.77
2612.89	1532.3
2615.56	1536.84
2618.23	1536.3
2620.9	1532.05
2623.57	1538.32
2626.23	1539.9
2628.9	1540.45
2631.57	1534.3
2634.23	1530.55
2636.89	1530.96
2639.55	1529.13
2642.22	1529.31
2644.88	1542.43
2647.54	1548.08
2650.2	1548.91
2652.85	1537.87
2655.51	1526.3
2658.17	1521.29
2660.82	1524.02
2663.48	1530.6
2666.13	1527.34
2668.78	1534.75
2671.44	1547.67
2674.09	1548.41
2676.74	1544.26
2679.39	1544.61
2682.04	1542.47
2684.68	1537.7
2687.33	1533.27
2689.98	1533.3
2692.62	1541.77
2695.27	1552.95
2697.91	1553.51
2700.55	1541.74
2703.19	1531.65
2705.84	1527.71
2708.48	1539.74
2711.11	1554.34
2713.75	1557.84
2716.39	1554.65
2719.03	1549.61
2721.66	1549.44
2724.3	1546.93
2726.93	1545.62
2729.57	1538.09
2732.2	1532.5
2734.83	1539.27
2737.46	1540.92
2740.09	1541.06
2742.72	1545.36
2745.35	1549.05
2747.98	1548.6
2750.6	1545.54
2753.23	1543.67
2755.85	1551.56
2758.48	1559.99
2761.1	1549.95
2763.72	1536.65
2766.35	1538.25
2768.97	1546.13
2771.59	1555.43
2774.21	1559.13
2776.82	1551.7
2779.44	1545.73
2782.06	1545
2784.67	1548.38
2787.29	1544.36
2789.9	1538.24
2792.52	1547.35
2795.13	1553.04
2797.74	1549.53
2800.35	1553.61
2802.96	1557.07
2805.57	1564.4
2808.18	1565.03
2810.79	1557.08
2813.39	1554.01
2816	1551.21
2818.6	1547.08
2821.21	1544.36
2823.81	1545.92
2826.41	1553.52
2829.02	1564.08
2831.62	1564.08
2834.22	1564.49
2836.82	1563.91
2839.41	1561.74
2842.01	1550.34
2844.61	1549.35
2847.2	1554.02
2849.8	1557.13
2852.39	1561.71
2854.99	1559.35
2857.58	1558.57
2860.17	1560.99
2862.76	1565.91
2865.35	1571.62
2867.94	1574.81
2870.53	1568.21
2873.12	1556.21
2875.7	1551.39
2878.29	1557.96
2880.87	1570.4
2883.46	1574.75
2886.04	1575.21
2888.63	1570.46
2891.21	1566.37
2893.79	1561.09
2896.37	1561.51
2898.95	1564.87
2901.53	1572.44
2904.1	1565.23
2906.68	1564.34
2909.26	1572.04
2911.83	1570.05
2914.41	1567.51
2916.98	1564.82
2919.55	1563.52
2922.13	1564.07
2924.7	1565.38
2927.27	1568.94
2929.84	1569.19
2932.41	1572.38
2934.97	1567.92
2937.54	1573.31
2940.11	1576.05
2942.67	1568.64
2945.24	1562.3
2947.8	1559.22
2950.36	1562.52
2952.93	1567.47
2955.49	1574.34
2958.05	1582.62
2960.61	1579.8
2963.17	1573.64
2965.73	1573.43
2968.28	1577.96
2970.84	1566.38
2973.4	1563.01
2975.95	1566.03
2978.5	1557.83
2981.06	1554.66
2983.61	1557.54
2986.16	1561.66
2988.71	1565.6
2991.26	1565.19
2993.81	1570.68
2996.36	1570.8
2998.91	1571.85
3001.46	1576.45
3004	1580.98
3006.55	1571.9
3009.09	1571.41
3011.64	1573.18
3014.18	1570.89
3016.72	1562.58
3019.26	1559.33
3021.8	1561.21
3024.34	1567.15
3026.88	1568.74
3029.42	1567.91
3031.96	1560.35
3034.49	1559.3
3037.03	1568.11
3039.56	1573.92
3042.1	1574.64
3044.63	1569.02
3047.16	1566.6
3049.69	1565.59
3052.23	1565.28
3054.76	1570.02
3057.29	1570.82
3059.81	1569.12
3062.34	1570.16
3064.87	1565.66
3067.39	1570.11
3069.92	1571.04
3072.44	1578.42
3074.97	1585.2
3077.49	1576.97
3080.01	1567.06
3082.53	1562.07
3085.05	1561.35
3087.57	1560.92
3090.09	1560.39
3092.61	1570.28
3095.13	1570.35
3097.65	1571.65
3100.16	1572.4
3102.68	1575.45
3105.19	1580.14
3107.7	1581.31
3110.22	1578.25
3112.73	1568.07
3115.24	1569.67
3117.75	1570.99
3120.26	1562.11
3122.77	1555.92
3125.28	1556.6
3127.78	1555.24
3130.29	1562.68
3132.8	1570.73
3135.3	1569.74
3137.8	1568.72
3140.31	1566.57
3142.81	1570.32
3145.31	1579.35
3147.81	1577.95
3150.31	1577.59
3152.81	1577.24
3155.31	1571.12
3157.81	1571.48
3160.3	1574.67
3162.8	1578.3
3165.3	1575.17
3167.79	1567.74
3170.28	1559.44
3172.78	1553.32
3175.27	1561.46
3177.76	1572.15
3180.25	1575.68
3182.74	1566.3
3185.23	1555.86
3187.72	1554.22
3190.21	1552.38
3192.69	1555.73
3195.18	1569.75
3197.66	1574.05
3200.15	1579.44
3202.63	1579.03
3205.12	1578.29
3207.6	1574.07
3210.08	1574.7
3212.56	1579.61
3215.04	1574.13
3217.52	1575.14
3220	1577.61
3222.47	1565.78
3224.95	1563.61
3227.43	1566.56
3229.9	1567.6
3232.38	1570.04
3234.85	1571.19
3237.32	1569.19
3239.79	1566.11
3242.27	1563.59
3244.74	1564.81
3247.21	1561.8
3249.68	1559.47
3252.14	1563.39
3254.61	1568.96
3257.08	1572.97
3259.54	1573
3262.01	1577.02
3264.47	1580.05
3266.94	1573.37
3269.4	1571.43
3271.86	1566.82
3274.32	1563.06
3276.78	1567.88
3279.24	1566.6
3281.7	1567.65
3284.16	1566.46
3286.62	1557.75
3289.07	1560.82
3291.53	1573.32
3293.98	1580.04
3296.44	1573.51
3298.89	1565.01
3301.35	1561.24
3303.8	1561.77
3306.25	1565.91
3308.7	1556.64
3311.15	1560.52
3313.6	1562.49
3316.05	1562.45
3318.49	1559.19
3320.94	1558.88
3323.39	1567.91
3325.83	1576.21
3328.28	1572.86
3330.72	1567.08
3333.16	1559.17
3335.61	1555.16
3338.05	1553.41
3340.49	1556.52
3342.93	1560.97
3345.37	1559.6
3347.81	1570.6
3350.24	1570.06
3352.68	1567.58
3355.12	1571.38
3357.55	1575.12
3359.99	1574.78
3362.42	1577.05
3364.85	1580.65
3367.29	1575.05
3369.72	1564.79
3372.15	1557.42
3374.58	1549.7
3377.01	1547.29
3379.44	1550.74
3381.86	1555.69
3384.29	1562.08
3386.72	1570
3389.14	1571.25
3391.57	1564.23
3393.99	1554.2
3396.42	1555.78
3398.84	1558.1
3401.26	1560.87
3403.68	1568.36
3406.1	1569.75
3408.52	1563.68
3410.94	1554.04
3413.36	1550.04
3415.78	1552.39
3418.19	1555.46
3420.61	1556.11
3423.02	1564.53
3425.44	1569.69
3427.85	1576.05
3430.26	1580.04
3432.68	1567.04
3435.09	1555.99
3437.5	1556.91
3439.91	1561.44
3442.32	1561.2
3444.72	1568.45
3447.13	1570.53
3449.54	1567.25
3451.95	1562.76
3454.35	1558.49
3456.76	1555.83
3459.16	1554.15
3461.56	1547.88
3463.97	1547.27
3466.37	1547.59
3468.77	1555.1
3471.17	1556.68
3473.57	1557.32
3475.97	1551.92
3478.36	1549.78
3480.76	1556.45
3483.16	1551.06
3485.55	1551.26
3487.95	1550.71
3490.34	1552.02
3492.74	1554.41
3495.13	1549.79
3497.52	1556.08
3499.91	1561.3
3502.3	1554.52
3504.69	1548.29
3507.08	1545.71
3509.47	1547.4
3511.86	1544.03
3514.25	1539.25
3516.63	1538.4
3519.02	1538.11
3521.4	1548.16
3523.79	1562.53
3526.17	1568.78
3528.55	1562.87
3530.93	1552.9
3533.32	1550.47
3535.7	1549.11
3538.08	1550.47
3540.45	1546.92
3542.83	1550.11
3545.21	1556.83
3547.59	1561.67
3549.96	1562.31
3552.34	1556.51
3554.71	1554.76
3557.09	1551.12
3559.46	1553.54
3561.83	1544.59
3564.2	1537.25
3566.57	1536.69
3568.94	1547.64
3571.31	1554.41
3573.68	1548.47
3576.05	1544.08
3578.42	1546.49
3580.78	1547.54
3583.15	1540.49
3585.51	1536.73
3587.88	1538.7
3590.24	1535.68
3592.6	1529.34
3594.97	1528.53
3597.33	1533.33
3599.69	1531.64
3602.05	1539.64
3604.41	1544.21
3606.77	1540.89
3609.12	1535.27
3611.48	1537.39
3613.84	1538.43
3616.19	1537.01
3618.55	1543.3
3620.9	1539.44
3623.26	1536.7
3625.61	1537
3627.96	1535.86
3630.31	1533.18
3632.66	1531.2
3635.01	1537.5
3637.36	1545.19
3639.71	1549.01
3642.06	1547.43
3644.41	1540.88
3646.75	1536.77
3649.1	1537.04
3651.44	1536.16
3653.79	1530.34
3656.13	1530.38
3658.47	1536.96
3660.81	1538.31
3663.16	1533.54
3665.5	1530.69
3667.84	1530.46
3670.17	1528.44
3672.51	1523.75
3674.85	1533.96
3677.19	1552.69
3679.52	1552.95
3681.86	1541.8
3684.19	1528.52
3686.53	1525.28
3688.86	1529.65
3691.2	1528.78
3693.53	1537.12
3695.86	1537.23
3698.19	1533.59
3700.52	1530.56
3702.85	1522.36
3705.18	1517.76
3707.5	1517.89
3709.83	1524.9
3712.16	1537.54
3714.48	1533.83
3716.81	1526.29
3719.13	1526.47
3721.46	1532.15
3723.78	1531.69
3726.1	1520.81
3728.42	1519.67
3730.74	1524.88
3733.06	1528.28
3735.38	1525.48
3737.7	1522.47
3740.02	1518.79
3742.34	1516.28
3744.65	1518.89
3746.97	1522.95
3749.28	1516.99
3751.6	1523.25
3753.91	1533.82
3756.22	1533.83
3758.54	1527.47
3760.85	1519.4
3763.16	1520.97
3765.47	1522.62
3767.78	1527.21
3770.09	1528.07
3772.39	1522.54
3774.7	1519.87
3777.01	1523.24
3779.31	1524.52
3781.62	1527.01
3783.92	1523.96
3786.23	1519.36
3788.53	1525.53
3790.83	1529.05
3793.13	1519.37
3795.44	1513.79
3797.74	1523.99
3800.03	1537.04
3802.33	1539.81
3804.63	1538.01
3806.93	1529.57
3809.23	1528.33
3811.52	1518.33
3813.82	1515.61
3816.11	1522.74
3818.41	1521.63
3820.7	1518.81
3822.99	1510.05
3825.28	1503.62
3827.58	1513.67
3829.87	1518.83
3832.16	1518.52
3834.45	1519.12
3836.73	1517.81
3839.02	1512.92
3841.31	1522.04
3843.6	1529.99
3845.88	1523.4
3848.17	1510.59
3850.45	1504.46
3852.73	1509.05
3855.02	1502.61
3857.3	1496.79
3859.58	1499.02
3861.86	1507.79
3864.14	1513.73
3866.42	1516.8
3868.7	1514.25
3870.98	1512.06
3873.26	1500.89
3875.53	1495.99
3877.81	1500.45
3880.08	1508.71
3882.36	1513.96
3884.63	1514.43
3886.91	1506.69
3889.18	1504.35
3891.45	1500.02
3893.72	1493.49
3895.99	1494.9
3898.26	1496.42
3900.53	1495.96
3902.8	1496.91
3905.07	1504.92
3907.33	1510.65
3909.6	1496.54
3911.87	1489.48
3914.13	1491.45
3916.4	1494.15
3918.66	1491.21
3920.92	1492.42
3923.19	1501.42
3925.45	1507.05
3927.71	1508.07
3929.97	1518.55
3932.23	1517.3
3934.49	1501.09
3936.74	1497.06
3939	1501.62
3941.26	1505.6
3943.52	1496.21
3945.77	1486.77
3948.03	1491.88
3950.28	1495.65
3952.53	1491.6
3954.79	1490.11
3957.04	1497.57
3959.29	1505.14
3961.54	1502.34
3963.79	1497.98
3966.04	1493.59
3968.29	1483.83
3970.54	1481.76
3972.78	1486.55
3975.03	1495.81
3977.28	1502.08
3979.52	1500.54
3981.77	1491.74
3984.01	1486.37
3986.26	1492.48
3988.5	1494.46
3990.74	1488.53
3992.98	1484.65
3995.22	1484.86
3997.46	1482.63
3999.7	1476.72
4001.94	1475.22
4004.18	1478.6
4006.42	1483.55
4008.65	1481.64
4010.89	1481.44
4013.12	1475.9
4015.36	1473.14
4017.59	1471.7
4019.82	1476.14
4022.06	1476.16
4024.29	1468.61
4026.52	1459.54
4028.75	1459.87
4030.98	1465.99
4033.21	1473.22
4035.44	1479.02
4037.67	1472.02
4039.89	1469.97
4042.12	1468.06
4044.35	1463.96
4046.57	1468.76
4048.8	1470.29
4051.02	1473.57
4053.24	1469.23
4055.47	1458.05
4057.69	1460.77
4059.91	1469.94
4062.13	1474.83
4064.35	1472.08
4066.57	1473.28
4068.79	1475.76
4071.01	1478.55
4073.22	1472.47
4075.44	1463.37
4077.66	1449.83
4079.87	1444.22
4082.09	1446.29
4084.3	1454.64
4086.51	1455.48
4088.73	1455.06
4090.94	1459.72
4093.15	1459.93
4095.36	1460.25
4097.57	1463.65
4099.78	1461.92
4101.99	1455.68
4104.2	1448.6
4106.4	1444.85
4108.61	1442.38
4110.82	1441.54
4113.02	1442.04
4115.23	1438.26
4117.43	1434.17
4119.63	1435.82
4121.84	1442.36
4124.04	1449.85
4126.24	1451.62
4128.44	1450.2
4130.64	1450.83
4132.84	1449.55
4135.04	1451.08
4137.24	1456.51
4139.44	1463.86
4141.63	1461.36
4143.83	1447.16
4146.02	1442.31
4148.22	1437.26
4150.41	1435.25
4152.61	1430.4
4154.8	1431.3
4156.99	1433.43
4159.18	1436.12
4161.37	1435.83
4163.57	1436.2
4165.75	1428.82
4167.94	1432.58
4170.13	1436.01
4172.32	1432.95
4174.51	1434.1
4176.69	1434.77
4178.88	1435.71
4181.06	1433.55
4183.25	1430.16
4185.43	1419.32
4187.62	1415.28
4189.8	1416.93
4191.98	1420.38
4194.16	1423.82
4196.34	1430.76
4198.52	1434.01
4200.7	1434.03
4202.88	1429.95
4205.06	1425.31
4207.24	1423.54
4209.41	1416.76
4211.59	1406.66
4213.76	1401.71
4215.94	1402.67
4218.11	1405.16
4220.29	1401.67
4222.46	1403.29
4224.63	1406.15
4226.8	1409.15
4228.97	1413.58
4231.14	1414.29
4233.31	1416.97
4235.48	1415.28
4237.65	1408.4
4239.82	1405.63
4241.99	1406.4
4244.15	1412.4
4246.32	1406.34
4248.48	1404.1
4250.65	1399.79
4252.81	1398.85
4254.97	1396.63
4257.14	1390.21
